1 **LF4/MOK and a CDK-related kinase regulate the**  
2 **number and length of cilia in *Tetrahymena***

3 Yu-Yang Jiang<sup>1</sup>, Wolfgang Maier<sup>2</sup>, Ralf Baumeister<sup>2</sup>, Gregory Minevich<sup>3</sup>, Ewa  
4 Joachimiak<sup>4</sup>, Dorota Wloga<sup>4</sup>, Zheng Ruan<sup>5</sup>, Natarajan Kannan<sup>5,6</sup>, Stephen Bocarro<sup>1</sup>,  
5 Anoosh Bahraini<sup>1</sup>, Krishna Kumar Vasudevan<sup>1</sup>, Karl Lehtreck<sup>1</sup>, Eduardo Orias<sup>7</sup>, and  
6 Jacek Gaertig<sup>1\*</sup>

7 <sup>1</sup>Department of Cellular Biology, University of Georgia, GA, USA

8 <sup>2</sup>Bio 3/Bioinformatics and Molecular Genetics, Faculty of Biology and ZBMZ, Faculty  
9 of Medicine, Albert-Ludwigs-University of Freiburg, Freiburg, Germany

10 <sup>3</sup>Department of Biochemistry and Molecular Biophysics, Columbia University Medical  
11 Center, New York, New York, USA

12 <sup>4</sup>Laboratory of Cytoskeleton and Cilia Biology, Nencki Institute of Experimental  
13 Biology of Polish Academy of Sciences, 3 Pasteur Street, Warsaw, Poland

14 <sup>5</sup>Institute of Bioinformatics, University of Georgia, Georgia, USA

15 <sup>6</sup>Department of Biochemistry and Molecular Biology, University of Georgia, Georgia,  
16 USA

17 <sup>7</sup>Department of Molecular, Cellular and Developmental Biology, University of  
18 California Santa Barbara, Santa Barbara, California, USA.

19 \* Corresponding author, email: [jgaertig@uga.edu](mailto:jgaertig@uga.edu)

20 **Short title:** *Cilia length regulation in a multiciliated cell*

21

## 22 **Abstract**

23 The length of cilia is controlled by a poorly understood mechanism that involves  
24 members of the conserved RCK kinase group, and among them, the LF4/MOK  
25 kinases. In *Tetrahymena*, a loss of an LF4/MOK ortholog, LF4A, lengthened the  
26 locomotory cilia, but also reduced their total number per cell. Without LF4A, cilia  
27 assembled faster and showed signs of increased intraflagellar transport (IFT).  
28 Consistently, overproduced LF4A shortened cilia and downregulated the IFT. GFP-  
29 tagged LF4A, expressed in the native locus and imaged by total internal reflection  
30 microscopy, was enriched at the basal bodies and distributed along the shafts of  
31 cilia. Within cilia, most LF4A-GFP particles were immobile and a few either diffused or  
32 moved by IFT. A forward genetic screen identified a CDK-related kinase, CDKR1,  
33 whose loss-of-function suppressed the shortening of cilia caused by overexpression  
34 of LF4A, by reducing its kinase activity. A loss of CDKR1 alone lengthened both the  
35 locomotory and oral cilia. CDKR1 resembles other known ciliary CDK-related kinases:  
36 LF2 of *Chlamydomonas*, mammalian CCRK and DYF-18 of *C. elegans*, in lacking the  
37 cyclin-binding motif and acting upstream of RCKs. We propose that the total  
38 LF4/MOK activity per cilium is dependent on both its activation by an upstream CDK-  
39 related kinase and cilium length. Previous studies showed that the rate of assembly  
40 is high in growing cilia and decreases as cilia elongate to achieve the steady-state  
41 length. We propose that in a longer cilium, the IFT components, which travel from  
42 the base to the tip, are subjected to a higher dose of inhibition by the uniformly

43 distributed LF4/MOK. Thus, in a feedback loop, LF4/MOK may translate cilium length  
44 into proportional inhibition of IFT, to balance the rates of assembly and disassembly  
45 at steady-state.

46

## 47 **Author summary**

48 Cilia are conserved organelles that generate motility and mediate vital sensory  
49 functions, including olfaction and vision. Cilia that are either too short or too long fail  
50 to generate proper forces or responses to extracellular signals. Several cilia-based  
51 diseases (ciliopathies) are associated with defects in cilia length. Here we use the  
52 multiciliated model protist *Tetrahymena*, to study a conserved protein kinase whose  
53 activity shortens cilia, LF4/MOK. We find that cells lacking an LF4/MOK kinase of  
54 *Tetrahymena*, LF4A, have excessively long, but also fewer cilia. We show that LF4A  
55 decreases the intraflagellar transport, a motility that shuttles ciliary precursors from  
56 the cilium base to the tip. Live imaging revealed that LF4A is distributed along cilium  
57 length and remains mostly immobile, likely due to its anchoring to ciliary  
58 microtubules. We proposed that in longer cilia, the intraflagellar transport machinery  
59 is exposed to a higher dose of inhibition by LF4A, which could decrease the rate of  
60 cilium assembly, to balance the rate of cilium disassembly in mature cilia that  
61 maintain stable length.

62

## 63 **Introduction**

64 The classical “long-zero” experiment in the green flagellate *Chlamydomonas*  
65 *reinhardtii* revealed that the length of cilia is regulated [1]. When one of the two cilia  
66 of *Chlamydomonas* was removed, the intact cilium immediately started to shorten,  
67 while the amputated cilium started to regrow. When both cilia reached about the  
68 same intermediate length, they continued to elongate at the same rate, to achieve  
69 an equal steady-state length [1]. These observations suggested that cilia length is  
70 sensed and actively maintained. A number of ciliopathies including Joubert syndrome  
71 [2], Meckel syndrome [3, 4], endocrine-cerebro-osteodysplasia syndrome [5, 6],  
72 short rib polydactyly syndrome [7, 8], retinitis pigmentosa [9, 10], non-syndromic  
73 recessive deafness [11], polycystic kidney disease [12, 13] and juvenile epilepsy  
74 [14] are caused by mutations in proteins that are affect cilium length.

75 The assembly of most cilia involves delivery of precursors from the cell body to the  
76 ciliary base, followed by their distribution along cilium by the intraflagellar transport  
77 (IFT) pathway [15]. During IFT, motor proteins move large protein complexes, IFT  
78 trains, that in turn ferry precursors of cilia, including tubulin, along axonemal  
79 microtubules [16-18]. Kinesin-2 is the IFT motor that operates in the anterograde  
80 direction, from the cilium base to the distal tip, where most of the precursors are  
81 incorporated into the axoneme [19, 20]. IFT dynein (dynein-2) returns IFT trains and  
82 components that turn-over back to the ciliary base [21-23]. The cilium disassembly  
83 pathway involves kinesin-related microtubule end destabilizers [24-28], and protein  
84 modifications including glutamylation [29], ubiquitination [30, 31] and  
85 phosphorylation (reviewed in [32]). In a mature cilium, its steady-state length  
86 results from a balance between the rates of assembly (mediated by IFT) and  
87 disassembly [33]. Importantly, IFT changes as a function of cilium assembly status.

88 In *Chlamydomonas*, the IFT train size [34, 35] and cargo load [16, 17, 36] are  
89 higher in assembling cilia as compared to steady-state or disassembling cilia. On the  
90 other hand, also in *Chlamydomonas*, the disassembly rate increases in cilia that are  
91 abnormally long [37]. These observations suggest that there are mechanisms that  
92 sense and adjust cilium length act by controlling the rates of cilia assembly (IFT) and  
93 disassembly.

94

95 Several conserved kinases negatively regulate cilium length (their loss makes cilia  
96 longer) including: two subgroups of the ROS cross-hybridizing kinases (RCKs):  
97 LF4/MOK [37-40] and DYF-5/ICK/MAK [38, 41-46], CDK-related kinases: LF2/CCRK  
98 and DYF-18 [43, 46-48], NRK/NEK [37, 49-52] and LF5/CDKL5 [53]. Consistently,  
99 inhibition of protein phosphatases (PP1 and PP2A) shortens cilia [54-57]. On the  
100 other hand, CDK5 in mammals [58, 59] and CDPK1 (ortholog of the mammalian  
101 CMKII) in *Chlamydomonas* [60], promote cilia assembly as their losses make cilia  
102 shorter. CDPK1 promotes cilia assembly by increasing the turnaround of IFT trains at  
103 the ciliary tip [60]. However, CDPK1 also decreases the assembly rate by inhibiting  
104 the entry of IFT trains into cilium [60].

105

106 Recent reports have linked some cilium length-regulating kinases to the anterograde  
107 IFT motor, kinesin-2. In *Chlamydomonas*, CDPK1 phosphorylates the tail domain of  
108 the motor subunit of kinesin-2 (FLA8) and a non-phosphorylatable substitution at  
109 this phosphorylation site (S663A) inhibits association of kinesin-2 with IFT complexes  
110 and reduces their entry into cilia [60]. In *C. elegans*, loss-of-function mutations in an  
111 RCK DYF-5, and a CDK-related DYF-18, rescue defective ciliogenesis caused by an

112 autoinhibitory mutation in the kinesin-2 motor OSM-3, suggesting that DYF-5 and  
113 DYF-18 inhibit kinesin-2 [46].

114

115 It remains unclear how cilium length is sensed and translated into proper  
116 modulations of the rates of cilium assembly and disassembly. The majority of  
117 published studies on the control of cilia length have been done in *Chlamydomonas*  
118 *reinhardtii* that carries two cilia, and in animal cells with single primary cilia  
119 (reviewed in [61-63]) and less is known about how cilium length is regulated in  
120 multiciliated cells, such as the ciliate *Tetrahymena thermophila* used here.

121

122 In *Chlamydomonas*, a loss of LF4 (long flagella protein 4, an ortholog of the  
123 mammalian MOK) makes cilia twice as long as in the wild type [39, 64], increases  
124 the amount of IFT proteins entering the cilium [35] and increases the rates of both  
125 cilium assembly and disassembly [37]. Here we investigate the significance of  
126 LF4/MOK in the multiciliated *Tetrahymena*. A single *Tetrahymena* cell carries  
127 between 500-1000 cilia, including oral cilia that support phagocytosis, and  
128 locomotory cilia that are arranged in ~20 longitudinal rows (reviewed in [65]).  
129 Importantly, in *Tetrahymena*, both the time of assembly and length are dependent  
130 on cilium type (oral versus locomotory) and position on the anteroposterior cell axis  
131 [50, 66, 67]. We find here that *Tetrahymena* has a single cilia-associated LF4/MOK  
132 kinase, LF4A, which negatively regulates the length, and positively regulates the  
133 number of locomotory cilia. We use a forward genetic screen to identify a CDK-type  
134 kinase, CDKR1, as an activator of LF4/MOK, which regulates the length of both  
135 locomotory and oral cilia. We propose that cilium length regulation involving  
136 LF4/MOK kinases is two-tiered. First, an upstream CDK-related kinase enhances the

137 kinase specific activity of LF4/MOK. Second, due to the ability of LF4/MOK to  
138 distribute along cilium length, the aggregated activity of LF4/MOK per cilium may  
139 increase as the cilium gets longer, thereby translating the organelle length into a  
140 proportional inhibition of IFT. Our observations also point to a link between cilium  
141 length and number in multiciliated cells. Finally, our data suggest that specific cilium  
142 length-regulating kinases can be targeted to subsets of cilia in the same multiciliated  
143 cell.

144

## 145 **Results**

### 146 **LF4A both shortens cilia and promotes ciliogenesis in**

#### 147 ***Tetrahymena***

148 The CMGC (CDK, MAP, GSK, CDK-like [68]) kinase family contains several conserved  
149 subfamilies whose members affect cilium length including: RCKs (subdivided into  
150 LF4/MOK and DYF-5/MAK/ICK groups), CDK-related kinases (LF2/CCRK and DYF-18)  
151 and LF5/CDKL5 kinases. We performed a phylogenetic analysis of the cilia-associated  
152 CMGC kinases of *Tetrahymena thermophila* and several ciliated and nonciliated  
153 species. The genome of *Tetrahymena* encodes members of each of the cilia-  
154 associated CMGC subfamily except for LF2/CCRK (Fig 1A). However, among the CDK-  
155 related kinases, TTHERM\_01080590 protein (that we will later rename CDKR1, see  
156 below) groups with DYF-18 of *C. elegans*, a cilia-associated kinase that was  
157 suggested to be a homolog of LF2/CCRKs [46, 48]. Among the RCKs, *Tetrahymena*  
158 has seven DYF-5/MAK/ICK type kinases and two LF4/MOK kinases: LF4A  
159 (TTHERM\_00058800) and LF4B (TTHERM\_00822360). While LF4A acts in cilia,

160 surprisingly, LF4B appears to be expressed only during the sexual process of  
161 conjugation, where it likely plays a non-ciliary role (see below and S1 Fig).

162 We constructed *Tetrahymena* cells homozygous for a disruption of the *LF4A* gene  
163 (LF4A-KO strain). The LF4A-KO cells assembled fewer locomotory cilia (especially in  
164 the posterior/dorsal region) that were 32% longer, compared to the wild type (Fig  
165 1B-1D). In the wild type, cilium length gradually increases from the anterior to the  
166 posterior cell end ([50] and Fig 1B). Such a length gradient was also apparent in the  
167 LF4A-KO cells despite the overall lengthening of cilia (Fig 1C). The length of oral cilia  
168 appeared unaffected (Fig 1B and 1C, arrows). In *Chlamydomonas*, LF4 decreases the  
169 rate of cilia assembly [35, 37]. In agreement, following deciliation of *Tetrahymena*  
170 by a pH shock, the locomotory cilia grew faster in LF4A-KO than in the wild type (Fig  
171 1E).

172

### 173 **Inside cilia, LF4A-GFP is mostly stationary and rarely diffuses** 174 **or moves as IFT cargo**

175 We added GFP to the C-terminus of LF4A, by engineering its gene (to preserved  
176 expression under the native promoter). Based on immunofluorescence, LF4A-GFP  
177 was strongly present at the ciliary bases (both oral and locomotory) and a weaker  
178 signal was scattered along the shafts of locomotory cilia (Fig 2B compare to 2A).  
179 Total internal reflection fluorescence microscopy (TIRFM) confirmed the enrichment  
180 of LF4A-GFP at ciliary bases and its weaker but uniform presence in the shafts of  
181 locomotory cilia (Fig 2D). In live cells imaged by TIRFM, most of LF4A-GFP particles  
182 were immobile and a few either diffused or moved along linear tracks with IFT  
183 velocities (in either anterograde or retrograde direction (Fig 2E, arrows)). The mobile



184 LF4A-GFP particles were rare: not more than a few percent of cilia per cell had  
185 convincingly mobile LF4A-GFP and even inside these cilia most of LF4A-GFP particles  
186 remained immobile (S1 video). This contrasts with the behavior of fluorescently  
187 tagged IFT proteins, most of which were mobile under the same imaging conditions  
188 (Fig. 2H, 2H' and 3H). Thus, most of LF4A may be anchored in the cilium. Based on  
189 immunofluorescence, the signal of LF4A-GFP in the ciliary shafts (but not at the basal  
190 bodies) greatly decreased after extraction with Triton X-100 (Fig 2C compare to 2B),  
191 indicating that the suggested anchorage of LF4A is weak.

192

193 The apparent paralog of LF4A, LF4B (Fig 1A) does not appear to be associated with  
194 cilia. LF4B-GFP was not detectable in the vegetatively-growing cells (S1A Fig). In the  
195 early phase of conjugation, LF4B-GFP localized to the junction between the two  
196 mating cells (S1B-S1C Fig), in a pattern that did not correspond to the positions of  
197 cilia in the vicinity of the conjugal junction [69-71]. Consistently, while the mRNA of  
198 *LF4A* is abundant in the vegetatively-growing cells, the mRNA of *LF4B* is present  
199 above the background only during the early stage of conjugation (S1D Fig, [72]).  
200 Likely, *Tetrahymena* has only a single cilia-associated LF4/MOK, LF4A.

201

## 202 **LF4A kinase activity shortens cilia and downregulates IFT**

203 We overproduced GFP-LF4A, using the Cd<sup>2+</sup>-inducible MTT1 promoter [73]. After 6 or  
204 more hours of exposure to added Cd<sup>2+</sup>, GFP-LF4A strongly accumulated at the bases  
205 of both oral and locomotory cilia, all cilia shortened to became stumps (Fig. 3B  
206 compare to the GFP control in Fig 3A, Fig 3F), and the cells became paralyzed. In  
207 addition, based on TIRFM, overproduced GFP-LF4A decorated two non-ciliary

208 microtubule-based structures: longitudinal microtubule bundles and contractile  
209 vacuole pores (S2A Fig, left panel), which suggests that LF4A has a microtubule-  
210 binding affinity. With time, the GFP-LF4A-overproducing cells became excessively  
211 large and misshaped (Fig 3D), indicating defects in cytokinesis. This is not surprising  
212 because in *Tetrahymena* locomotory cilia are required for the scission of daughter  
213 cells at the end of cytokinesis [74].

214

215 *In vitro*, LF4 of *Chlamydomonas* phosphorylates a generic substrate of  
216 serine/threonine kinases, myelin basic protein (MBP) and autophosphorylates [39].  
217 Likewise, GFP-LF4A pulled down from overproducing *Tetrahymena*, phosphorylated  
218 MBP and itself *in vitro* (Fig 3E). An overproduced GFP-LF4A with a substitution of the  
219 conserved F82 (gatekeeper residue), GFP-LF4A<sup>F82A</sup>, had greatly reduced kinase  
220 activity *in vitro* (Fig 3E) and did not shorten cilia *in vivo* (Fig 3C and Fig 3F). While  
221 the overproduced GFP-LF4A accumulated at the ciliary bases (Fig. 3B and S2A Fig  
222 left panel), the kinase-weak GFP-LF4A<sup>F82A</sup> accumulated at the tips of cilia (Fig 3C and  
223 S2A Fig middle panel). Overproduced mCherry-LF4A<sup>F82A</sup> accumulated in cilia, but  
224 unlike GFP-LF4A<sup>F82A</sup> was not enriched at the ciliary tips (S2A Fig right panel, S2C Fig  
225 middle and right panel). Thus, the tip enrichment of GFP-LF4A<sup>F82A</sup> could be an artifact  
226 of the epitope tag, possibly caused by oligomerization of GFP [75]. Inside cilia, the  
227 particles of overproduced mCherry-LF4A and mCherry-LF4A<sup>F82A</sup> were either immobile  
228 or moved with the IFT trains (S2B Fig). Thus, the kinase activity of LF4A is required  
229 for its cilia-shortening activity but is not required for its entry into cilia, anchorage or  
230 transport by IFT.

231

232 It is intriguing that only the kinase weak and not the active version of GFP-LF4A  
233 accumulates at the ciliary tips (Fig 3B-C, S2A Fig). The overproduced GFP-LF4A may  
234 fail to build up at the ciliary tips, if its kinase activity blocks the anterograde IFT of  
235 cargoes, including GFP-LF4A itself. We thus examined how the levels of LF4A affect  
236 IFT. In cells expressing a tagged IFT subcomplex B protein, GFP-DYF1/IFT70 [76,  
237 77], the loss of LF4A significantly increased the velocities of both the anterograde  
238 and retrograde IFT (Fig 2F and 2H). Overexpression of GFP-LF4A mildly decelerated  
239 the anterograde but not retrograde IFT (Fig 2G and 2H'). Overproduced mCherry-  
240 LF4A (but not mCherry-LF4A<sup>F82A</sup>) decreased the velocities of both the anterograde  
241 and retrograde IFT based on imaging of a tagged IFT subcomplex A subunit IFT140  
242 [19, 78], IFT140-GFP (Fig 3G left panel, Fig 3H). In addition, the loss of LF4A  
243 significantly increased the frequency of the anterograde (but not the retrograde) IFT  
244 events (Fig 2F right panel). Overexpression of GFP-LF4A strongly reduced the IFT  
245 event frequencies in the anterograde direction in cells with GFP-DYF1 reporter (Fig.  
246 2G right panel, fig 2H') while overexpression of mCherry-LF4A (but not mCherry-  
247 LF4A<sup>F82A</sup>) decreased IFT frequency in both directions in cells expressing IFT140-GFP  
248 (Fig 3G right panel, Fig 3H). The inhibitory impact of overproduced LF4A on IFT  
249 frequencies was likely underestimated, because many cilia in these cells lacked  
250 detectable IFT motility and very short cilia could not be analyzed (S2 and S3  
251 movies). Overall these observations indicate that LF4A inhibits IFT by reducing both  
252 the frequency and velocity of IFT trains.

253

## 254 **Identification of an LF4A interactor, CDKR1**

255 To find potential interactors of LF4/MOK, we performed a genetic screen for  
256 suppressors of GFP-LF4A overexpression, taking advantage of the resulting cell

257 paralysis. We introduced a GFP-LF4A transgene operating under the MTT1 promoter  
258 and linked to the *neo5* marker (ovGFP-lf4a allele) into the (germline) micronucleus,  
259 by replacing the native *LF4A* locus (Fig 4A and S3 Fig). The transgene-carrying strain  
260 was mutagenized with nitrosoguanidine and subjected to self-fertilization by  
261 uniparental cytogamy [79]. This procedure generates whole genome homozygotes,  
262 each derived from a single, diploidized meiotic product of the parent cell, and thus  
263 allows for isolation of recessive and dominant mutations. Cd<sup>2+</sup> was added to the  
264 mutagenized progeny to induce overexpression of GFP-LF4A and to paralyze the non-  
265 suppressed progeny. Suppressors were isolated based on their capacity to swim to  
266 the top of test tubes (Fig 4B). Five independent suppressor clones (designated as F0  
267 generation clones) were isolated, while none were found among the progeny of a  
268 similar number (~3 x 10<sup>7</sup>) of non-mutagenized cells. To distinguish between the  
269 extragenic and intragenic suppressions, we tested each suppressor mutation for  
270 linkage with the transgene-coupled *neo5* marker that confers resistance to  
271 paromomycin. The F0s were crossed to a wild type and the F1 heterozygous progeny  
272 were used to generate F2s by self-fertilization. Tight linkage (essentially 0%  
273 recombinants) was expected for an intragenic suppressor mutation while a  
274 completely unlinked single suppressor mutation would yield a 1:1 ratio of  
275 recombinant to parental F2 genotypes (Fig 4C and S3 Fig). Four suppressor clones  
276 (SUP2,3,4 and 5) were judged to be intragenic, and one suppressor clone (SUP1)  
277 was judged to be extragenic, based on the ~1:2 ratio of the parental versus  
278 recombinant F2 phenotypes (the excess of recombinants could be spurious, due to  
279 unequal growth rates of suppressed and unsuppressed F2 progeny).

280

281 When the four intragenic suppressors were exposed to Cd<sup>2+</sup> to induce overproduction  
282 of GFP-LF4A, SUP2 lacked a GFP signal while SUP3, SUP4, SUP5 had a strong GFP-

283 LF4A signal at the tips of cilia (Fig 4E compare to the non-suppressed cell in Fig 4D,  
284 S4 Fig), as seen earlier for GFP-LF4A<sup>F82A</sup> (Fig 3C). The extragenic suppressor, SUP1,  
285 had a GFP-LF4A signal at the ciliary bases, but also the length and at the tips of  
286 short (presumably assembling) cilia (Fig 4F).

287 Sanger DNA sequencing of the ovGFP-LF4A transgene in SUP2 revealed multiple  
288 mutations in the MTT1 and GFP portions of the transgene, consistent with the lack of  
289 GFP fluorescence. SUP3, SUP4 and SUP5 carried single point mutations, predicted to  
290 result in E132K, G13S and E160K substitutions, respectively, in the kinase domain of  
291 LF4A. A homology-based model of the LF4A kinase domain (using the 3D structure of  
292 CDK of *Cryptosporidium* (Chain A of PDB 3NIZ) as a template [80, 81]) revealed that  
293 all three affected amino acids are adjacent to the kinase active site (Fig 4H, 4I).

294 While it is not clear how these mutations affect LF4A, in other kinase types  
295 substitutions at the positions equivalent to G13 and E132 are associated with  
296 diseases [82].

297

298 To identify the causal mutation in the single extragenic suppressor SUP1, we used  
299 comparative whole-genome sequencing as recently described [83]. A number of  
300 independent (meiotic segregant) F2 clones, all derived from a single sup1/SUP1<sup>+</sup>  
301 heterozygote, were combined into a suppressed and a non-suppressed pool (Fig 5A  
302 and 5B) and the pooled genomic DNAs were sequenced. The sequence variants  
303 found in the suppressed pool were subjected to bioinformatic subtractions (to  
304 remove variants also found in the unsuppressed pool and in other unrelated strains)  
305 and filtering (for nitrosoguanidine-type mutations [84]) (Fig 5C). These steps yielded  
306 three variants, each located on a different micronuclear chromosome (S1 Table). We  
307 also used the “allelic composition contrast analysis (ACCA)” to plot the frequency of

308 variant cosegregation with the suppression phenotype along each of the five  
309 micronuclear chromosomes [83]. A single peak of linkage was present on the  
310 micronuclear chromosome 3 at a bp location between 9 to 10 Mb (Fig 5E), a region  
311 that intersected with one of the three variants identified by subtractions and  
312 filtration: the T to C mutation on macronuclear scaffold 8254401 at bp location  
313 105680, in the gene *THERM\_01080590*, which encodes a kinase. The mutation  
314 changes the predicted stop into a tryptophan codon and adds a "WIRNLLILNG"  
315 sequence to the otherwise normal C-terminus of THERM\_01080590 protein (Fig  
316 5D). Based on a kinase profiling search [85, 86], THERM\_01080590 is a CDK-  
317 related kinase and therefore we named the *THERM\_01080590* gene *CDKR1* (cyclin-  
318 dependent kinase-related 1). Among several metazoan species analyzed, CDKR1 is  
319 most similar to DYF-18 (Fig 1A), a known cilia-associated CDK-related kinase of *C.*  
320 *elegans*, which was proposed to be a homolog of LF2/CCRK CDK kinases [46, 48].  
321 While our phylogenetic analysis does not support either DYF-18 or CDKR1 as  
322 orthologs of LF2/CCRK, we note that DYF-18, CDKR1, LF2 and CCRK are all CDK-type  
323 kinases that lack the cyclin-binding motif, PSTAIRE, characteristic of the canonical  
324 CDKs that regulate the cell cycle (S5C Fig), and are all associated with cilia where  
325 they act upstream of RCKs (see below and [40, 43, 47, 48, 64]).

326

## 327 **CDKR1 is a negative regulator of cilium length that activates** 328 **LF4A**

329 In an otherwise wild-type background, the *cdkr1<sup>sup1</sup>* allele mildly increased cilium  
330 length (Fig 4G). In cells overproducing GFP-LF4A, the *cdkr1<sup>sup1</sup>* allele partially  
331 suppressed the shortening of cilia (Fig 4G). To clarify whether *cdkr1<sup>sup1</sup>* is a gain or  
332 loss-of-function allele, we produced a strain with a null allele, CDKR1-KO. The

333 locomotory cilia of CDKR1-KO cells were much longer than those of the wild-type or  
334 CDKR1<sup>sup1</sup> cells (Fig 6C compare with 6A, 6E, 4G). Thus, likely the *cdkr1<sup>sup1</sup>* allele is a  
335 hypomorph.

336

337 The CDKR1<sup>sup1</sup> protein has 10 extra amino acids at the C-terminus but is otherwise  
338 normal, and thus the effect of the sup1 mutation was unclear. We used homology  
339 modeling to predict the structure of CDKR1 and its sup1 version. The closest 3D  
340 structure available is the human CDK2 (PDBID: 2IW8) [87], to which we could align  
341 most of CDKR1 (I12-N308). We attempted to model the remaining 23 (33 in sup1)  
342 C-terminal amino acids without a template. A Jpred [88] secondary structure  
343 prediction indicated that the LKKWIRNLL peptide in sup1 protein forms an alpha-  
344 helix. Thus, the WIRNLLILNG extension may enlarge the contact between the C-  
345 terminal tail of CDKR1 (that lies on the surface of the kinase domain) and the  
346 catalytically important C-helix (S5A Fig). As mentioned earlier, unlike the canonical  
347 CDKs that regulate the cell cycle, CDKR1 (and other cilia-associated CDK-related  
348 kinases DYF-18, LF2 and CCRK) lacks the cyclin-binding motif, PSTAIRE (S5C Fig).  
349 The WIRNLLILNG extension may pack to the region of the C-helix where cyclin  
350 typically binds in the canonical CDKs (S5B fig). Thus, the C-terminal tail extension in  
351 the sup1 version may affect the C-helix conformation in the critical regulatory region  
352 that is important for kinase activation.

353

354 To explore further how CDKR1 may interact with LF4A, we compared the phenotypes  
355 of the respective null mutants. The locomotory cilia of CDKR1-KO cells were similar  
356 in length to those of LF4A-KO, and also more sparsely present in the posterior cell  
357 region (Fig 6A-C and 6E). Strikingly, while the oral cilia seemed unaffected in LF4A-

358 KO, they were exceptionally long in CDKR1-KO (Fig 6C compare to 6A and 6B,  
359 marked with "oa"). The excessively long oral cilia were most striking in the old  
360 (anterior) oral apparatus of the dividing cells (Fig 6C' compare to 6A' and 6B', the old  
361 oral apparatus marked with "oa") Unlike the wild-type and LF4A-KO cells, the  
362 CDKR1-KO cells could be maintained long-term only on the specialized medium MEPP  
363 that supports proliferation of mutants deficient in phagocytosis [89], indicating that  
364 the oral cilia in CDKR1-KO were functionally compromised. Overall the phenotype of  
365 CDKR1-KO was more severe as compared to LF4A-KO. The two null alleles similarly  
366 affected the locomotory cilia but only the loss of CDKR1 lengthened the oral cilia. The  
367 double knockout (LF4A-KO\_CDKR1-KO) cells had the phenotype similar to the single  
368 knockout CDKR1-KO, including long oral cilia (Fig. 6D-D' and Fig 6E). To summarize,  
369 both LF4A and CDKR1 regulate the length of locomotory cilia (likely by acting in the  
370 same linear pathway, see below), while only CDKR1 significantly contributes to the  
371 length of oral cilia.

372

373 Next, we examined how the phenotype of overexpression of GFP-LF4A (shortening of  
374 cilia) is affected by a complete loss of CDKR1. We compared two strains with the  
375 ovGFP-LF4A transgene that were either otherwise wild-type (CDKR1<sup>+</sup>) or CDKR1-KO.  
376 Without Cd<sup>2+</sup> treatment, the ovGFP-LF4A\_CDKR1<sup>+</sup> cells had normal length cilia, while  
377 the ovGFP-LF4A\_CDKR1-KO cells had fewer and excessively long locomotory and oral  
378 cilia, as expected (Fig 7A and 7B). When GFP-LF4A overexpression was induced with  
379 Cd<sup>2+</sup>, cilia shortened in both strains, but to a different degree. While ovGFP-  
380 LF4A\_CDKR1<sup>+</sup> cells experienced a strong shortening of all cilia (locomotory and oral)  
381 (Fig 7C), in the ovGFP-LF4A\_CDKR1-KO cells, both the locomotory and oral cilia  
382 shortened only partially and consequently had about a wild-type length (Fig 7D  
383 compare to 1B). Next, we tested whether overproduction of GFP-LF4A in the CDKR1-



384 KO background normalizes the functionality of cilia, by examining the cell  
385 multiplication rate, that in *Tetrahymena* is dependent on the health of both oral and  
386 locomotory cilia [65]. As expected, without added Cd<sup>2+</sup>, the ovGFP-LF4A\_CDKR1-KO  
387 cells grew more slowly than the ovGFP-LF4A\_CDKR1<sup>+</sup> cells (Fig 7G). Remarkably,  
388 after addition of Cd<sup>2+</sup>, the multiplication rate pattern had inverted; the ovGFP-  
389 LF4A\_CDKR1<sup>+</sup> cells ceased to multiply, while the ovGFP-LF4A\_CDKR1-KO cells  
390 multiplied faster (Fig 7G). Thus, a complete loss of CDKR1 is rescued by  
391 overexpression of LF4A. These observations argue that the major if not only function  
392 of CDKR1 is to positively regulate a kind of activity provided by LF4A.

393

394 One way how a loss of CDKR1 may affect the outcome of overexpression of GFP-  
395 LF4A is by decreasing its stability. Among three ovGFP-LF4A\_CDKR1-KO clones (all  
396 derived from the same F1) that were phenotypically similar, the levels of  
397 overexpressed GFP-LF4A were highly variable (S6A Fig). Similarly, the levels of  
398 overproduced GFP-LF4A varied among several clones that all carried the *cdkr1<sup>sup1</sup>*  
399 allele (S6B Fig). While the sources of this variability are unclear, it appears that the  
400 suppression phenotype does not strictly correlate with the levels of overproduced  
401 GFP-LF4A. Strikingly, GFP-LF4A overproduced in the CDKR1-KO cells, strongly  
402 accumulated near the tips of cilia (Fig 7F compare to Fig 7E), which is a phenocopy  
403 of the kinase-weak GFP-LF4A<sup>F82A</sup> (Fig 3C and S4C-E). Also, GFP-LF4 was enriched at  
404 the tips of some cilia in the presence of the hypomorphic allele *cdkr1<sup>sup1</sup>* but not in  
405 the wild-type background (Fig 4F compare to 4D). These observations suggest that  
406 deficiencies of CDKR1 reduce the kinase activity of overproduced GFP-LF4A. Indeed,  
407 overproduced GFP-LF4A pulled down from either the CDKR1-KO or *cdkr1<sup>sup1</sup>* cells had  
408 reduced kinase activity *in vitro* as compared to the same protein from a wild-type  
409 background (Fig 7H and S6C). Thus, CDKR1 increases the kinase activity of LF4A.

410 However, even without CDKR1, overproduced LF4A has residual kinase activity *in*  
411 *vitro* (Fig. 7H) and *in vivo* as it partially shortens cilia (Fig. 7D compare to 7B).

412

413 Under the native conditions, CDKR1 regulates the length of locomotory cilia, most  
414 likely by activating LF4A (based on the similarity of the null phenotypes in regard to  
415 the locomotory cilia, Fig 6). To regulate the length of oral cilia, CDKR1 may activate  
416 LF4A and one or more of the unstudied RCKs (Fig. 1A) that could be partially  
417 redundant with LF4A. That LF4A functions in both locomotory and oral cilia (despite a  
418 lack of effect of its loss on the length of oral cilia) is indicated by 1) the presence of  
419 LF4A-GFP near the basal bodies (Fig 2B, 2C), the cilia-shortening activity of GFP-  
420 LF4A (Fig 3B) and the enrichment of multiple kinase-weak variants of GFP-LF4A at  
421 the tips (Fig 3C and S4C-E) of both locomotory and oral cilia. To summarize, CDKR1  
422 increases the kinase activity of LF4A to promote shortening of locomotory cilia and  
423 may act through LF4A and another RCK to shorten the oral cilia (Fig. 7I).

424

## 425 **Discussion**

### 426 **Ciliary and non-ciliary roles of RCKs**

427 LF4/MOK and DYF-5/MAK/ICK are two conserved subgroups of RCK kinases. While  
428 most ciliated lineages, including mammals, have both LF4/MOK and DYF-5/MAK/ICK,  
429 *C. elegans*, *Drosophila* and zebrafish lack LF4/MOK (Fig 1A); thus DYF-5/MAK/ICK  
430 can be sufficient for ciliary functions suggesting that the two subtypes of RCKs have  
431 closely-related activities. This is not the case of *Chlamydomonas* [39, 64], and  
432 *Tetrahymena* (this study) where LF4/MOK loss-of-function mutants have abnormally

433 long cilia despite the presence of DYF-5/MAK/ICK homologs. To our knowledge the  
434 significance of the mammalian ortholog MOK has not been established yet. While  
435 most RCKs are linked to cilia, some non-ciliated species, including *Dictyostelium*  
436 *discoideum* and fungi, have RCKs (Fig 1A). In the budding yeast its RCK, Ime2,  
437 functions in meiosis and sporulation (reviewed in [90]). We show that among the  
438 two LF4/MOK kinases of *Tetrahymena*, LF4A regulates cilia, while LF4B is expressed  
439 during conjugation. Possibly, following the whole genome duplication [91], LF4A  
440 retained the ancestral ciliary function [92], while LF4B underwent  
441 neofunctionalization.

442

#### 443 **RCKs and their CDK activators affect both cilium length and number**

444 The *Tetrahymena* cells lacking either LF4A or its activator, CDKR1 (see below), have  
445 longer but also fewer locomotory cilia. In the mouse, a loss of ICK or its activator  
446 CCRK, in different cell types leads to either longer or shorter cilia [5, 42, 93].  
447 Importantly, in *Chlamydomonas*, hypomorphic LF2 alleles confer longer cilia, but a  
448 null allele produces variable length (including shorter) cilia and inability to  
449 regenerate cilia after deciliation [47, 64, 94]. Loss of either RCKs or LF2/CCRK cause  
450 excessive accumulation of IFT materials in cilia, which could create roadblocks that  
451 reduce the efficiency of IFT [40-42, 47, 93, 95]. In the multiciliated cells, such as  
452 *Tetrahymena*, the excessively long cilia may deplete factors whose concentration is  
453 rate-limiting for ciliogenesis in other parts of the same cell. To summarize, the long,  
454 short or even absent cilia could be parts of a single phenotypic spectrum caused by  
455 an underlying defect of excessive cilia assembly.

456

457 **RCKs inhibit IFT**

458 The key question is how LF4/MOK (and other RCKs) control cilium length. We show  
459 that overexpression of LF4A shortens cilia and decreases the IFT speeds and  
460 frequencies. These observations, together with the work by others (see below)  
461 indicate that LF4/MOK (and more broadly RCKs) act on cilium length by inhibiting  
462 IFT. In *Tetrahymena*, the anterograde IFT is needed for outgrowth of cilia from the  
463 basal bodies [96-98], while the retrograde IFT is not required for ciliogenesis  
464 (without retrograde IFT, *Tetrahymena* cells assemble cilia that are more variable in  
465 length but have a nearly normal average length [99]). Thus, the phenotype of  
466 overexpression of GFP-LF4A is a phenocopy of a loss of the anterograde but not the  
467 retrograde IFT, suggesting that LF4/MOK inhibits the anterograde IFT.

468

469 We show here that the LF4A activity reduces the velocities of IFT trains. In  
470 particular, the anterograde IFT direction was consistently affected by manipulations  
471 of LF4A in all assays used. In *Chlamydomonas* and mammalian cells, deficiencies in  
472 LF4/MOK did not change the IFT train velocities [38, 40, 100]. On the other hand, in  
473 mammalian cells, a depletion of ICK increased the rate of anterograde IFT and its  
474 overexpression reduced the rate of retrograde IFT, respectively [38]. However, in *C.*  
475 *elegans*, loss-of-function mutations of DYF-5 reduce IFT speeds in both directions  
476 [41, 46]. Thus, the effects of RCKs on IFT velocities are inconsistent across different  
477 models. In *Chlamydomonas*, the anterograde IFT velocity increases as the growing  
478 cilium lengthens [34]. It is therefore possible that at least some changes in the IFT  
479 velocities caused by manipulations of RCKs in different models are secondary to  
480 changes in cilium length.

481

482 RCKs could be controlling cilium length by reducing the frequency of IFT trains,  
483 which would reduce the delivery of precursors needed for assembly of cilia. In  
484 support of this model, we show that a loss LF4A increases the frequency of  
485 anterograde and retrograde IFT trains. We also show that overexpression of LF4A  
486 reduces the IFT frequencies. One caveat is that our imaging approach may not  
487 detect smaller IFT particles and it is already known that size of IFT particles changes  
488 (decreases) as the cilium grows [34]. In *Chlamydomonas* a loss of LF4 increases the  
489 amount of IFT motors entering cilia [35]. Thus our observations and those made in  
490 *Chlamydomonas* [35] indicate that LF4/MOK reduces the pool of IFT trains entering  
491 cilia. It is also well documented that cilia deficient in RCKs have elevated levels IFT  
492 proteins, including cilia of *Chlamydomonas* lacking LF4 [40] and cilia of mammalian  
493 cells [42, 95] and *C. elegans* [41] deficient in DYF-5/ICK/MAK. In the absence of  
494 RCKs, excessive anterograde IFT may not be balanced by the retrograde IFT, leading  
495 to accumulation of IFT proteins in cilia.

496

497 Another parameter that may contribute to the assembly rate is the cargo occupancy  
498 on IFT trains, which is known to be higher in growing cilia as compared to the  
499 steady-state or disassembling cilia [16, 17, 36]. While to our knowledge, the effects  
500 of RCKs on the IFT cargo occupancy have not been studied, in *Chlamydomonas*, a  
501 loss of LF2, a CDK kinase that acts upstream of LF4 [39, 40, 47, 64], increases the  
502 frequency of IFT trains carrying tubulin [16]. Here we also show that LF4A is both a  
503 regulator and a cargo of IFT. An overexpressed kinase-weak variant of GFP-LF4A  
504 accumulated at the ciliary tips while an active GFP-LF4A accumulated at the ciliary  
505 base, which agrees with the model that the kinase activity of LF4A inhibits the IFT-  
506 mediated transport of cargoes (including itself) to the tips of cilia. Similar  
507 observations were reported for ICK in mammalian cells [5, 38]. All these

508 observations taken together are consistent with RCKs inhibiting transport of cargoes  
509 to the ciliary tip through inhibition of the anterograde IFT.

510

511 Several recent studies have linked cilium length kinases, including RCKs, to  
512 regulation of kinesin-2, the anterograde IFT motor. In *C. elegans*, loss-of-function  
513 mutations in DYF-5, and its likely upstream activator DYF-18, rescue the short cilia  
514 phenotype caused an autoinhibitory mutation in OSM-3 kinesin-2 subunit, indicating  
515 that DYF-5 and DYF-18 inhibit OSM-3 [46]. *In vitro*, ICK phosphorylates the tail of  
516 murine kinesin-2 motor subunit, KIF3A, at T674. While, in mammalian cells cilia are  
517 only mildly affected by T674A, mutating multiple phosphorylatable amino acids in the  
518 tail of KIF3A inhibits ciliogenesis in zebrafish [42]. In *Chlamydomonas*, CDPK1  
519 phosphorylates the tail of kinesin-2 motor FLA8, on S663 *in vitro*. A phospho-  
520 mimicking mutant of FLA8 (S663D) lacks cilia, presumably due to inability of kinesin-  
521 2 to associate with IFT trains. While S663A mutation or depletion of CDPK1 both  
522 result in shorter cilia, CDPK1 also promotes the turnaround of IFT materials at the  
523 ciliary tip [60]. To summarize, the cilium-shortening influences of RCKs and CDPK1  
524 may be mediated by phosphorylation and inhibition of kinesin-2 and the resulting  
525 reduction of anterograde IFT.

526

527 To our knowledge, we are first to image an RCK in live cells under near-native  
528 conditions. Strikingly, in the cilium, most of LF4A-GFP particles are stationary and  
529 scattered along the cilium length. A small subset of LF4A-GFP particles occasionally  
530 undergoes diffusion or moves with the IFT speeds as reported for overexpressed  
531 MOK and ICK in mammalian cells [38] and DYF-5 in *C. elegans* [41, 46]. LF4A may  
532 have a microtubule-binding ability, based on our observation that overproduced GFP-

533 LF4A decorates non-ciliary microtubules. While our study suggest that ciliary LF4 is  
534 weakly anchored, in *Chlamydomonas* most of the ciliary LF4 remains associated with  
535 the axoneme after detergent extraction [40]. An anchorage to the axoneme could  
536 concentrate LF4/MOK near the passing IFT trains. The total exposure of IFT  
537 components to LF4/MOK could therefore be higher in a longer cilium. In this manner,  
538 an increased axoneme length may be translated into a proportionally decreased IFT  
539 activity, which would balance the rate of assembly with the rate of disassembly at  
540 steady state. Others have shown that the length of microtubules influences their  
541 properties by increasing the total amount of regulators landing on the polymer  
542 surface. For example, the end depolymerization rate is higher in a longer microtubule  
543 due to increased landing of depolymerizers that build up to a higher concentration at  
544 microtubule ends [101, 102]. As argued above, the activity of LF4/MOK decreases  
545 the IFT train entry rate. Because IFT trains enter at the ciliary base, a component of  
546 IFT trains would need to be reused in the subsequent IFT round, to convey a length-  
547 dependent feedback of the axoneme-anchored LF4/MOK. While many of the IFT  
548 components are replaced by fresh IFT proteins that arrive from the cell body, some  
549 (including IFT54) are partially recycled [103].

550

### 551 **CDK-related kinases (LF2/CCRK and DYF-18/CDKR1) are activators of RCKs**

552 The first evidence that CDK-related LF2/CCRK kinases acts upstream of RCKs was an  
553 observation in *Chlamydomonas*, that an LF2 mutation is epistatic to an LF4 mutation  
554 [39]. The mammalian ortholog of LF2, CCRK, phosphorylates ICK and MAK on  
555 threonine of the  $\text{I}\underline{\text{x}}\text{Y}$  motif in the kinase activation loop [104-107]. In glioblastoma  
556 cells, overexpression of ICK inhibits ciliogenesis and this effect is suppressed by  
557 either a CCRK knockdown or by mutating T157 in the  $\text{T}\underline{\text{x}}\text{Y}$  motif of ICK [43]. A recent

558 study found that in *Chlamydomonas* LF4 is phosphorylated at T159 of the TxY motif,  
559 and this phosphorylation requires LF2, suggesting that LF2 phosphorylates T159 of  
560 LF4 [40]. Here we used an unbiased approach to identify a CDK-related protein,  
561 CDKR1, as an activator of LF4A. CDKR1 resembles the LF2/CCRK and DYF-18. All  
562 these cilia-length regulating kinases are structurally similar to the canonical CDKs  
563 but lack the PSTAIRE cyclin-binding motif (S5C Fig). By analogy to other cilia-  
564 associated CDK kinases, CDKR1 may activate LF4A by phosphorylating the threonine  
565 in the TxY motif. Fu and colleagues showed that ICK is also weakly activated by  
566 autophosphorylation of tyrosine in the TxY motif [105]. Consistently, we show that  
567 LF4A is weakly active even without CDKR1 *in vitro* and *in vivo*. That overproduced  
568 LF4A rescues the cilia defects caused by a loss of CDKR1 indicates that the major  
569 function of CDKR1 is to activate LF4A or a similar activity provided by another  
570 kinase. Likely, CDKR1 acts by activating LF4A in the locomotory cilia and as  
571 discussed above, in addition to LF4A, activates another RCK in oral cilia. Our  
572 observations suggest that multiple RCKs are differentially utilized in different types of  
573 cilia and perhaps also among cilia located at different positions. Future studies on the  
574 seven uncharacterized DYF-5/ICK/MAK kinases of *Tetrahymena* could provide further  
575 insights into how subsets of cilia are managed by multiple length-regulating kinases  
576 in a single cell.

577

## 578 **Materials and methods**

579



## 580 **Phylogenetic analysis of cilium length kinases**

581 The cilium length-associated and CDK members of the CMGC kinase group were  
582 identified in multiple species by reciprocal BLASTp searches using sequences of well-  
583 studied proteins. Sequences were aligned with ClustalX 1.82 [108] and corrected  
584 manually in SEAVIEW [109]. A neighbor-joining tree was calculated with the Phylip  
585 package (using SEQBOOT, PROTDIST, NEIGHBOR and CONSENSE) [110]. The tree  
586 was visualized using FIGTREE ( <http://tree.bio.ed.ac.uk/software/figtree/> ). The  
587 following are NCBI accession numbers, names and abbreviated names used for the  
588 alignments and the phylogenetic tree: XP\_001030514.2 (TTHERM\_01080590,  
589 CDKR1), NP\_503323.2 (DYF-18\_Ce), NP\_002737.2 (MAPK3\_Hs), XP\_001018592.1  
590 (TTHERM\_00286770), EAR97232.2 (TTHERM\_00483640), XP\_001020875.2  
591 (TTHERM\_00411810), NP\_524420.1 (CDK2\_Dm), XP\_001027728.1  
592 (TTHERM\_01035490), XP\_0010219111.2 (TTHERM\_01207660), NP\_001777.1  
593 (CDK1\_Hs), NP\_009718.3 (CDC28\_Sc), XP\_001698637.1 (CDK\_Cr), AAF55917.1  
594 (CG6800\_Dm), ABK34487.1 (LF2\_Cr), NP\_001034892.1 (CCRK\_Hs),  
595 XP\_009302023.1 (CDK20\_Dr), NP\_490952.2 (CDK7\_Ce), NP\_001790.1 (CDK7\_Hs),  
596 NP\_001256291.1 (CDKL5\_Ce), NP\_001124243.1 (CDKL5\_Dr), NP\_001310218.1  
597 (CDKL5\_Hs), XP\_001008848.2 (TTHERM\_00185770), AGC12987.1 (LF5\_Cr),  
598 EAR90584.2 (TTHERM\_00122330), EAR90792.3 (TTHERM\_00141000), NP\_055041.1  
599 (MOK\_Hs), AAO86687.1 (LF4\_Cr), EAR83896.4 (TTHERM\_00822360, LF4B),  
600 EAR87368.2 (TTHERM\_00058800, LF4A), EAR93150.1 (TTHERM\_00450990),  
601 EAR95676.2 (TTHERM\_00267860), EAR89127.2 (TTHERM\_00576780), EAR90889.2  
602 (TTHERM\_00144940), EAR82017.1 (TTHERM\_01347900), XP\_001697865.1  
603 (MAPK7\_Cr), NP\_001129786.2 (Dyf-5\_Ce), NP\_001260307.1 (MAPK7\_Dm),  
604 XP\_009295564.1 (MAK\_Dr), XP\_011512721.1 (ICK\_Hs), NP\_005897.1 (MAK\_Hs),  
605 XP\_647537\_Dd.

606

607 **Strains and cultures and cilia regeneration**

608 SPP medium [111] with antibiotics, SPPA [112] was used to grow *Tetrahymena* with  
609 exception of strains with severe cilia defects, which were maintained in MEPP  
610 medium [89] with 2 µg/ml dextrose (MEPPD) [25]. CdCl<sub>2</sub> (2.5 µg/ml) was added to  
611 induce MTT1-driven overproduction of proteins [73]. Deciliation and cilia  
612 regeneration were done as described in [113].

613

614 **Gene disruption, native locus tagging and overexpression.**

615

616 *Native locus-based epitope tags*

617 To tag *LF4A* at the native locus, the plasmid pKIN13AnativeGFP [25] was modified to  
618 make a derivative to target the 3' end of the *LF4A* coding region. To this end, 1.3 kb  
619 and 0.7 kb fragments of *LF4A* were amplified using the primer pairs: 5'-  
620 AATACCGCGGACTTTCAACCAAACAAAACACTCA-3', 5'-  
621 TATTACGCGTTACTTATTA AAAACTGGCTTTTTACC-3' and 5'-  
622 AATAATCGATAAACTACTTTATAGCTGTTTGT TTTTGA-3', 5'-  
623 TTATGAGCTCGTGAGTCTAAACCTCCAGCAG-3' and cloned on the sides of a fragment  
624 consisting of a GFP coding region, a *BTU1* transcription terminator and a *neo3*  
625 cassette in reverse orientation.

626

627 We constructed a *neo5* cassette that is similar to the one published in [114]. To tag  
628 LF4B at the native locus, two 1.1 kb fragments were amplified using the primer  
629 pairs: 5'-ATAAGGGCCCGCAGCAGATGATAGTGGAG-3', 5'-  
630 TATTGAGCTCCATAGCATGGTACAGGAATCG-3', 5'-  
631 ATAACCGCGGTAAGTCTTTTTCAATGTTTATGC-3', 5'-  
632 TATTCTCGAGGAAAAGGCTGGCAAGCG-3' and cloned on the sides of a fragment  
633 consisting of a GFP coding region, a *BTU1* transcription terminator and *neo5* in  
634 reverse orientation.

635

636 To engineer a plasmid for tagging IFT140 in the native locus, a 0.5 kb terminal  
637 fragment of a the IFT140 coding region (THERM\_00220810) was amplified using  
638 primers 5'-AATA ACGCGTGTATTGAGTAATTAGAACTAAGCTCAA-3' and 5'-  
639 AATTGGATCCTTCTGGGACATCTTCTTCAATG-3' and used to replace the corresponding  
640 part of pFAP43-GFP-*neo4* [115] plasmid using MluI and BamHI sites. Next, a 0.9 kb  
641 fragment of the 3' UTR of *IFT140* was amplified using primers 5'-  
642 AAATCTGCAGCTTCATAGTAACTGACTACATTTAAAA-3' and 5'-  
643 AATTCTCGAGACAAGCCATGCGAAAATG-3' and cloned into pFAP43-GFP-*neo4* using  
644 PstI and XhoI sites. Next *neo4* was replaced by the *pac* cassette that confers  
645 resistance to puromycin [116]. The resulted plasmid pIFT140-GFP-*pac* enables native  
646 expression of a IFT140 with a C-terminal GFP tag separated from IFT140 by a short  
647 linker (GSGGGSGTG).

648

#### 649 *Gene knockouts*

650 For disruption of *LF4A*, two 1.2 kb genomic fragments of *LF4A* were amplified using  
651 the primer pairs: 5'-TATTGGGCCCTAATTTTATGTGATAGTCTTTATG-3', 5'-

652 TTATCCCGGGTGATTATCTCTAAATATTAATGTC-3', and 5'-  
653 TTAAGTGCAGCAGATATATATGGGATAATATTTA-3', 5'-  
654 ATATCCGCGGTTTAGGAGTATATTTTCATAGTAT-3' and cloned on the sides of *neo4*  
655 [117]. The germline-based total homozygotes were tested for the absence of the  
656 targeted *LF4A* fragment using a diagnostic PCR with primers: 5'-  
657 GTTTCGCCTCATCCTCACAT-3' and 5'-AGAGAGATAATATGCAGGGCG-3'.

658

659 To disrupt *CDKR1*, the targeting homology arms were amplified with the following  
660 primer pairs: 5'-TATTGAGCTCAAATTTGAGGCACTACATTC-3', 5'-  
661 TATTCCGCGGATTACCAAGCAAATCAG-3' and 5'-  
662 TATTAAGCTTCATAAGCAAAAATAAAATGCC-3', 5'-  
663 TATTATCGATGTAAAAGTGAAGGAGCATTGTC-3' and cloned on the sides of *neo5*. The loss  
664 of the targeted part of *CDKR1* was confirmed in homozygotes using diagnostic  
665 primers: 5'-TTTAAAGATGACTCTGTACC-3' and 5'-CTGCAAGAGACTTGTATGC-3' that  
666 amplify the targeted sequence.

667

### 668 *Overexpression*

669 For overexpression of GFP-LF4A at the *BTU1* locus, a 2.7 kb *LF4A* coding sequence  
670 was amplified using primers: 5'-TATTACGCGTCATGAACTAATATAAATTG-3', 5'-  
671 TATTGGATCCTCATTACTTATTAATAAAC-3' and cloned into pMTT1-GFP [118]. For  
672 overexpression of the kinase-weak GFP-LF4A<sup>F82A</sup> variant, the pMTT1-GFP-LF4A  
673 plasmid was subjected to site-directed mutagenesis using the QuikChange Lightning  
674 kit (Agilent 210518) with the primers 5'-

675 CAGGACGTTTGGCACTAGTGGCTGAATTGATGGATCAGAACC-3' and 5'-

676 GGTCTGATCCATCAATTCAGCCACTAGTGCCAAACGTCCTG-3'.

677

678 For overexpression of GFP-LF4A at the native (*LF4A*) locus, a 1.3 kb 5' UTR fragment  
679 of *LF4A* was amplified with primers: 5'-AATAGAGCTCATTAAGATCTCCTAACATGGAAT-  
680 3', 5'-TATTCCGCGGCTTCTCTGAGTAGCTTCAAACAA-3'. Next, a 3.5 kb fragment of  
681 GFP-LF4A from pMTT1p-GFP-LF4A was amplified with primers: 5'-  
682 AATAGTCGACGATGAGTAAAGGAGAAGAAGAACTTTT-3', 5'-  
683 TATTGGGCCCTCATTACTTATTAATAAACTGGC-3'. These fragments were cloned on the  
684 sides of *neo5* immediately followed by a *MTT1* promoter to make pNeo5\_ovGFP-  
685 LF4A. The pNeo5\_ovGFP-LF4A plasmid was used for generating a germline integrant  
686 in which the *MTT1* gene promoter is placed in front of a coding region expressing  
687 GFP-LF4A (in the *LF4A* locus) and the derived heterokaryon was used in the  
688 suppressor screen (see below).

689

690 Our *neo5* was used to make plasmids for somatic disruptions of *LF4A* and  
691 overproduction of GFP-LF4A (pNeo5\_ovGFP-LF4A) in the background of *MTT1*-GFP-  
692 DYF1 placed in the *BTU1* locus as described [119].

693

694 To overexpress mCherry-LF4A, the GFP coding region in pNeo5\_ovGFP-LF4A was  
695 replaced with that of mCherry [120], which was amplified with primers: 5'-  
696 CTAAACTTAAATAATGGCCAAGTCGACGGTTTCAAAGGAGAAGAAG-3', 5'-  
697 GATAACAATTTATATTAGTTCATGACGCGTTTGTAAGTTCATCCATACC-3' from pNeo4-  
698 mCherry. To overexpress mCherry-LF4A<sup>F82A</sup>, the GFP-LF4A part of pNeo5\_ovGFP-

699 LF4A was replaced with two fragments that provide the sequence of mCherry-  
700 LF4A<sup>F82A</sup> using NEBuilder Hifi DNA Assembly. The point mutation was created at the  
701 junction between the two fragments, which were amplified with the following primer  
702 pairs: 5'-CTAAACTTAAAATAATGGCCAAGTCGACGGTTTCAAAGGAGAAGAAG-3', 5-  
703 CAATTCAGCCACTAGTGCCAAACGTCCTGTAG-3', 5'-  
704 GCACTAGTGGCTGAATTGATGGATCAGAACC-3' AND 5'-  
705 CAAAAGCTGGGTACCGGGCCCATATGGGTGGCGTG-3' from pNeo5\_ovmCherry-LF4.

706

707 The pNeo5\_ovmCherry-LF4A and pNeo5\_ovmCherry-LF4A-F82A plasmids were also  
708 used for overexpression in the background of either MTT1<sub>p</sub>-GFP-DYF1 placed in the  
709 *BTU1* locus as described [119] or IFT140-GFP in its own locus using a somatic  
710 (macronuclear) approach.

711

## 712 **Somatic and germline transformation.**

713 All procedures for generating somatic and germline transformants and crosses were  
714 done as described [112, 113] with some changes. For the germline biolistic  
715 transformation, 100 µg of plasmid DNA was digested with restriction enzymes to  
716 release the targeting fragment, and used to coat gold particles (SeaShell S550d or  
717 Chempur 900040), which were then deposited onto seven microcarriers and fitted  
718 into the hepta adapter (Biorad). A biolistic shooting was performed 4 hours after  
719 mixing of CU428 and B2086 strains. The hepta adapter assembly was positioned on  
720 the third slot from the top inside PDS1000/He and the rapture disk had the value of  
721 1800 psi. The conjugating cells were spread as a thin layer onto a 10-cm wide Petri  
722 dish containing a layer of Tris-Agar (10 mM Tris-HCl pH 7.4, 1.5% agar) and

723 positioned at the bottom-most slot of PDS1000/He. To generate homokaryons, we  
724 either used the standard procedure based on two rounds of genomic exclusion or the  
725 short circuit genomic exclusion (SCGE) [121] with either B\*VI or B\*VII [83].  
726 Specifically, the homokaryons for SUP1, CDKR1-KO, LF4A-KO\_CDKR1-KO, ovGFP-  
727 LF4A and ovGFP-LF4A\_CDKR1-KO were made using the SCGE. For genotyping the  
728 *cdkr1<sup>sup1</sup>* allele its sequence introduced an MboI restriction site that was detected in  
729 the 1 kb PCR product (with primers 5'-TGGTGATTTTGGATCAGCT-3' and 5'-  
730 CTTGCTTTCCTCAAATAAAC-3').

731

## 732 **Confocal and TIRF microscopy**

733 For immunofluorescence, cells were stained as described [119] using a simultaneous  
734 fixation (2% paraformaldehyde) and permeabilization (0.5% Triton X-100). To test  
735 for association with the cytoskeleton, cells were permeabilized with 0.5% Triton X-  
736 100 prior to fixation with paraformaldehyde. The primary antibodies were: anti-GFP  
737 (1:100 Abcam ab6556), anti-centrin 20H5 (1:200, Millipore 04-1624), and anti-  
738 polyglycine serum 2302 (1:200, gift of Martin Gorovsky, University of Rochester).  
739 The secondary antibodies were purchased from Jackson Immuno Research. Images  
740 were taken using a Zeiss LSM 710 or LSM 880 confocal microscope (63x oil  
741 immersion, 1x or 1.5x digital zoom) and analyzed with Fiji-ImageJ software [122].  
742 The total internal reflection fluorescence microscopy of *Tetrahymena* was done as  
743 described [76]. Images and video recordings were processed in Fiji-ImageJ [122].

## 744 **Western blots**

745 Protein samples were separated on a 10% SDS-PAGE. The gels were either stained  
746 with blue silver [123], or proteins were transferred onto a PVDF membrane for  
747 western blotting. Primary antibodies used with western blots were: anti-GFP (Abcam  
748 ab6556 at 1:5000 or Rockland 600-401-215 at 1:1000), and the anti-thiophosphate  
749 ester 51-8 (1:2000-5000, Abcam ab92570). Colorimetric images of stained gels and  
750 luminescent images of western blots were recorded using ChemiDoc MP System and  
751 processed with Image Lab (Biorad).

752

## 753 ***In vitro* kinase assay**

754 *Tetrahymena* cultures at  $2 \times 10^5$  /ml (30 ml) of strains expressing GFP-LF4A were  
755 treated with  $\text{CdCl}_2$  (2.5  $\mu\text{g/ml}$ ) for 3-5 hours, cells were collected at 1700 rcf for 3  
756 min and washed once with 10 mM Tris-HCl (pH 7.5). A lysis buffer (5 ml per 30 ml of  
757  $\text{Cd}^{2+}$  induced cells) was added that contained 0.5% NP-40, a phosphatase inhibitor  
758 cocktail (20 mM beta-glycerophosphate, 1 mM sodium orthovanadate, 1 mM  
759  $\text{Na}_4\text{P}_2\text{O}_7$ , 20 mM NaF) and 70 mM E64, in TBS (20 mM Tris-HCl pH 7.5, 150 mM  
760 NaCl). PMSF was added to 1 mM immediately before suspending the cell pellets. The  
761 mixtures were kept on ice and were pipetted vigorously every 10 minutes for 3  
762 times. Then, the mixtures were spun at 20,000 rcf for 15 minutes. The supernatants  
763 were collected, diluted with 2 volumes of TBS so that the NP-40 concentration is  
764 below 0.2% for immunoprecipitation with GFP-Trap beads (agarose, ACC0CM-  
765 GFA0050, Allele). The GFP-Trap beads were added to the diluted lysate (10-15  $\mu\text{l}$   
766 resin per 30 ml of the starting culture). The mixtures were then incubated at 4 °C for  
767 2 hr. The beads were pelleted at 2500 rcf for 2 min, washed with: TBS, TBS with 500



768 mM NaCl, and the kinase buffer (50 mM Tris-HCl pH 7.2, 100 mM NaCl, 10mM  
769 MgCl<sub>2</sub>). A total of 30 µl of the kinase buffer with 1 mM DTT, 100 µM ATP-gamma-S  
770 (Biolog 88453-52-5) and phosphatase inhibitors cocktails were added to no more  
771 than 15 µl of the beads slurry along with 20 µg MBP (Active Motif 31314). The kinase  
772 assay mixtures were incubated for 30-120 minutes at 30°C. The reactions were  
773 either stored overnight refrigerated or immediately terminated by addition of 2.5 mM  
774 PNBM (Abcam ab138910) followed by incubation for 2 hours at room temperature.  
775 The samples were then treated with the sample buffer and separated by SDS-PAGE.  
776 The thio-phosphorylation was detected using anti-thiophosphate ester 51-8 (1:2000-  
777 5000, rabbit, Abcam ab92570).

778

## 779 **Genetic screen for suppressors of GFP-LF4A overexpression**

780 The neo5-MTT1<sub>p</sub>-GFP-LF4a fragment was targeted to the *LF4A* locus in the  
781 micronucleus by biolistic transformation as described [112] using the hepta adapter  
782 as outlined above. The heterokaryon strain named ovGFP-LF4A-HE-3B (mic: neo5-  
783 ovGFP-lf4a/neo5-ovGFP-lf4a mac: wildtype, VII) was grown to 1x10<sup>5</sup> cells/ml (40 ml  
784 total), and treated 10 µg/ml of nitrosoguanidine (Sigma-Aldrich) for 3 hours at 30°C.  
785 The mutagenized culture was subjected to starvation in Dryl's buffer [124](1.7 mM  
786 sodium citrate, 1 mM NaH<sub>2</sub>PO<sub>4</sub> , 1 mM Na<sub>2</sub>HPO<sub>4</sub> and 1.5 mM CaCl<sub>2</sub>), overnight at  
787 30°C. The mutagenized cells were mixed with an equal volume and number of  
788 starved B\*VI and subjected to uniparental cytogamy [79]. Briefly, 5-6 hours after  
789 strain mixing, the conjugating cells were treated with 1.4% glucose for 45 minutes  
790 (by addition of an appropriate volume of 20% glucose) and diluted with 7-8 volumes  
791 of sterile water. The cells were spun down, suspended in 30 ml of SPPA and split into

792 5 ml samples, each kept in a 500 ml round media bottle (six total) at room  
793 temperature overnight to complete conjugation. SPPA (45 ml) was added to each  
794 bottle, followed by incubation at 30°C for 3 hr. Paromomycin was added to the final  
795 concentration of 200 µg/ml to select the conjugation progeny. After 24-36 hours of  
796 selection at 30°C, the pm-r cells were collected by centrifugation, each sample was  
797 suspended in fresh 40 ml SPPA with 2.5 µg/ml CdCl<sub>2</sub> and incubated in 50 ml conical  
798 centrifuge tubes in vertical positions overnight at room temperature. Due to the GFP-  
799 LF4A overproduction and the resulting loss of cilia, unsuppressed cells become  
800 paralyzed and sunk to the bottom of the tubes. Cells carrying suppressor mutations  
801 remained motile near the tube top. The supernatants (4-5 ml) were collected from  
802 the top of each vertically positioned tube and the cells were transferred into 5 ml  
803 fresh SPPA in 15 ml conical tubes, incubated horizontally for 6 hours to overnight,  
804 then washed and suspended in 10 ml SPPA with 2.5 µg/ml CdCl<sub>2</sub> and the tubes were  
805 kept vertically oriented overnight. Single clones were isolated from the top 1 ml of  
806 culture of each tube and retested for suppression on 96-well plates. The F0s (isolated  
807 suppressor clones) were matured and mated to the cycloheximide resistance (cy-r)  
808 heterokaryon CU427 (mic: *chx1-1/chx1-1*, mac: + mt VI) or CU427.7 (mic: *chx1-1*  
809 */chx1-1*, mac: + mt VII) and the F1 progeny was recovered as pm-r and cy-r cells.  
810 The F1s were matured and allowed to assort to paromomycin sensitivity (pm-s). To  
811 make F2s, assorted pm-s F1 were subjected to SCGE with B\*VI or B\*VII as  
812 described [83]. The F2s were cloned by picking pm-r cells from independently  
813 selected wells, grown in SPPA, and replica-plated on SPPA with 2.5 µg/ml CdCl<sub>2</sub> to  
814 test for paralysis.

815

816 **Identification of the causal mutations for suppressors.**

817 For the intragenic suppressors, total genomic DNA was extracted from a pool of F2s  
818 and the several 1-1.2 kb overlapping fragments covering MTT1p-ovGFP-LF4A  
819 transgene were amplified and sequenced using the Sanger method.

820

821 Pools of clones were prepared containing pm-r F2s obtained by SCGE from a single  
822 sup1/sup1<sup>+</sup> F1. The unsuppressed pool contained 12 F2s clones that consistently  
823 became paralyzed in Cd<sup>2+</sup> and the suppressed pool contained 14 F2 clones that  
824 remained motile in Cd<sup>2+</sup>. The two pools were grown in 25 ml volumes, starved for 2  
825 days at room temperature in 60 mM Tris-HCl and the total genomic DNAs of the  
826 pools were extracted, using the urea method [125]. The genomic DNAs were  
827 subjected to whole genome sequencing using Illumina technology exactly as  
828 described [83]. Sequences were aligned to the macronuclear reference genome  
829 (June 2014 version, GenBank assembly accession GCA\_000189635.1) [126] and  
830 variants were detected filtered and subtracted as described [83]. In parallel, the  
831 suppressor and non-suppressor reads were aligned to the micronuclear reference  
832 genome [127] and the allelic contrast analysis was performed as described [83] to  
833 detect a micronuclear chromosome location with increased frequency of variant  
834 cosegregation with the mutant (suppressed) phenotype using MiModD (Version 0.1.8  
835 [128]).

836

## 837 **Structural modeling of LF4A and CDKR1 kinases**

838 Curated multiple sequence alignment profiles of protein kinases from diverse  
839 organisms were used to classify CDKR1 [68, 129, 130]. MAPGAPS [131] and HMMER  
840 [132] were used to detect and align CDKR1 to the best matching CDC2 profile [133].

841 The template for 3D homology modeling of LF4A was identified by performing a  
842 BLAST search against the PDB database using blastp routine from the NCBI [134].  
843 The cyclin-dependent kinase from *Cryptosporidium* (Chain A of PDB 3NIZ, 37%  
844 sequence identity) was chosen as the template. MODELLER (version 9.12) was used  
845 to generate the homology model for LF4A from 3NIZ using the automodel module  
846 [81]. ADP and magnesium ions present in the template were also included in the  
847 modeled structure of LF4A. Jpred [88] was used to generate a secondary structure  
848 prediction of the CDKR1 (TTHERM\_01080590) sequence. To make a structural model  
849 of CDKR1, *ab initio* protein structure prediction algorithms and I-TASSER were used  
850 [135-138]. The visualization of the modeled structures was performed using PyMOL  
851 [135].

852

## 853 **Acknowledgements**

854 This work was supported by the NIH grants R21HD092809 (to JG) and  
855 5RO1GM114409 (to NK), a bridge funding from the Office of the Vice-President for  
856 Research and the Department of Cellular Biology at the University of Georgia (to JG),  
857 the National Science Foundation grant MCB-1149106 (to NK), grants from Deutsche  
858 Forschungsgemeinschaft BIOSO CRC746 and CRC850 (to RB), and grants from the

859 National Science Centre, Poland: OPUS13 2017/25/B/NZ3/01609 (to DW) and  
860 OPUS15 2018/29/B/NZ3/02443 (to EW). GM was supported by a pre-doctoral  
861 fellowship from the National Institutes of Health (1F31NS074841-01). We thank  
862 Martin A. Gorovsky (University of Rochester) for the polyG antibodies. We also  
863 acknowledge the assistance of Muthugapatti K. Kandasamy at the UGA Biomedical  
864 Microscopy Core with confocal imaging.

865

## 866 **References**

867

- 868 1. Rosenbaum JL, Moulder JE, Ringo DL. Flagellar elongation and shortening in  
869 *Chlamydomonas*. The use of cycloheximide and colchicine to study the sythesis and  
870 assembly of flagellar proteins. JCell Biol. 1969;41:600-19.
- 871 2. Dafinger C, Liebau MC, Elsayed SM, Hellenbroich Y, Boltshauser E, Korenke  
872 GC, et al. Mutations in KIF7 link Joubert syndrome with Sonic Hedgehog signaling and  
873 microtubule dynamics. J Clin Invest. 2011;121(7):2662-7. Epub 2011/06/03. doi:  
874 10.1172/JCI43639. PubMed PMID: 21633164; PubMed Central PMCID:  
875 PMCPMC3223820.
- 876 3. Tammachote R, Hommerding CJ, Sinderson RM, Miller CA, Czarnecki PG,  
877 Leightner AC, et al. Ciliary and centrosomal defects associated with mutation and  
878 depletion of the Meckel syndrome genes MKS1 and MKS3. Hum Mol Genet.  
879 2009;18(17):3311-23. Epub 2009/06/12. doi: 10.1093/hmg/ddp272. PubMed PMID:  
880 19515853; PubMed Central PMCID: PMCPMC2733821.
- 881 4. Slaats GG, Isabella CR, Kroes HY, Dempsey JC, Gremmels H, Monroe GR, et  
882 al. MKS1 regulates ciliary INPP5E levels in Joubert syndrome. J Med Genet.  
883 2016;53(1):62-72. Epub 2015/10/23. doi: 10.1136/jmedgenet-2015-103250. PubMed  
884 PMID: 26490104; PubMed Central PMCID: PMCPMC5060087.
- 885 5. Moon H, Song J, Shin JO, Lee H, Kim HK, Eggenschwiller JT, et al. Intestinal cell  
886 kinase, a protein associated with endocrine-cerebro-osteodysplasia syndrome, is a key  
887 regulator of cilia length and Hedgehog signaling. Proc Natl Acad Sci U S A.  
888 2014;111(23):8541-6. doi: 10.1073/pnas.1323161111. PubMed PMID: 24853502;  
889 PubMed Central PMCID: PMC4060650.

- 890 6. Oud MM, Bonnard C, Mans DA, Altunoglu U, Tohari S, Ng AY, et al. A novel ICK  
891 mutation causes ciliary disruption and lethal endocrine-cerebro-osteodysplasia  
892 syndrome. *Cilia*. 2016;5:8. doi: 10.1186/s13630-016-0029-1. PubMed PMID: 27069622;  
893 PubMed Central PMCID: PMC4827216.
- 894 7. Thiel C, Kessler K, Giessler A, Dimmler A, Shalev SA, von der Haar S, et al. NEK1  
895 mutations cause short-rib polydactyly syndrome type majewski. *Am J Hum Genet*.  
896 2011;88(1):106-14. Epub 2011/01/08. doi: 10.1016/j.ajhg.2010.12.004. PubMed PMID:  
897 21211617; PubMed Central PMCID: PMC3014367.
- 898 8. Taylor SP, Dantas TJ, Duran I, Wu S, Lachman RS, University of Washington  
899 Center for Mendelian Genomics C, et al. Mutations in DYNC2L1 disrupt cilia function  
900 and cause short rib polydactyly syndrome. *Nature communications*. 2015;6:7092. Epub  
901 2015/06/17. doi: 10.1038/ncomms8092. PubMed PMID: 26077881; PubMed Central  
902 PMCID: PMC4470332.
- 903 9. Stone EM, Luo X, Heon E, Lam BL, Weleber RG, Halder JA, et al. Autosomal  
904 recessive retinitis pigmentosa caused by mutations in the MAK gene. *Investigative  
905 ophthalmology & visual science*. 2011;52(13):9665-73. Epub 2011/11/24. doi:  
906 10.1167/iovs.11-8527. PubMed PMID: 22110072; PubMed Central PMCID:  
907 PMC3341124.
- 908 10. Ozgul RK, Siemiatkowska AM, Yucel D, Myers CA, Collin RW, Zonneveld MN, et  
909 al. Exome sequencing and cis-regulatory mapping identify mutations in MAK, a gene  
910 encoding a regulator of ciliary length, as a cause of retinitis pigmentosa. *Am J Hum  
911 Genet*. 2011;89(2):253-64. Epub 2011/08/13. doi: 10.1016/j.ajhg.2011.07.005. PubMed  
912 PMID: 21835304; PubMed Central PMCID: PMC3155188.
- 913 11. Grati M, Chakchouk I, Ma Q, Bensaid M, Desmidt A, Turki N, et al. A missense  
914 mutation in DCDC2 causes human recessive deafness DFNB66, likely by interfering with  
915 sensory hair cell and supporting cell cilia length regulation. *Hum Mol Genet*.  
916 2015;24(9):2482-91. Epub 2015/01/21. doi: 10.1093/hmg/ddv009. PubMed PMID:  
917 25601850; PubMed Central PMCID: PMC4383862.
- 918 12. Liu S, Lu W, Obara T, Kuida S, Lehoczky J, Dewar K, et al. A defect in a novel  
919 Nek-family kinase causes cystic kidney disease in the mouse and in zebrafish.  
920 *Development*. 2002;129(24):5839-46. PubMed PMID: 12421721.
- 921 13. Upadhyaya P, Birkenmeier EH, Birkenmeier CS, Barker JE. Mutations in a NIMA-  
922 related kinase gene, Nek1, cause pleiotropic effects including a progressive polycystic  
923 kidney disease in mice. *Proc Natl Acad Sci U S A*. 2000;97(1):217-21. PubMed PMID:  
924 10618398.
- 925 14. Castren M, Gaily E, Tengstrom C, Lahdetie J, Archer H, Ala-Mello S. Epilepsy  
926 caused by CDKL5 mutations. *Eur J Paediatr Neurol*. 2011;15(1):65-9. doi:  
927 10.1016/j.ejpn.2010.04.005. PubMed PMID: 20493745.
- 928 15. Kozminski KG, Johnson KA, Forscher P, Rosenbaum JL. A motility in the  
929 eukaryotic flagellum unrelated to flagellar beating. *Proc Natl Acad Sci USA*.  
930 1993;90:5519-23.

- 931 16. Craft JM, Harris JA, Hyman S, Kner P, Lechtreck KF. Tubulin transport by IFT is  
932 upregulated during ciliary growth by a cilium-autonomous mechanism. *J Cell Biol.*  
933 2015;208(2):223-37. doi: 10.1083/jcb.201409036. PubMed PMID: 25583998; PubMed  
934 Central PMCID: PMC4298693.
- 935 17. Wren KN, Craft JM, Tritschler D, Schauer A, Patel DK, Smith EF, et al. A  
936 differential cargo-loading model of ciliary length regulation by IFT. *Curr Biol.*  
937 2013;23(24):2463-71. doi: 10.1016/j.cub.2013.10.044. PubMed PMID: 24316207;  
938 PubMed Central PMCID: PMC3881561.
- 939 18. Qin H, Diener DR, Geimer S, Cole DG, Rosenbaum JL. Intraflagellar transport  
940 (IFT) cargo: IFT transports flagellar precursors to the tip and turnover products to the cell  
941 body. *J Cell Biol.* 2004;164(2):255-66. Epub 2004/01/14. doi: 10.1083/jcb.200308132.  
942 PubMed PMID: 14718520; PubMed Central PMCID: PMC2172340.
- 943 19. Cole DG, Diener DR, Himelblau AL, Beech PL, Fuster JC, Rosenbaum JL.  
944 *Chlamydomonas* kinesin-II-dependent intraflagellar transport (IFT):IFT particles contain  
945 proteins required for ciliary assembly in *Caenorhabditis elegans* sensory neurons. *J Cell*  
946 *Biol.* 1998;18:993-1008.
- 947 20. Kozminski KG, Beech PL, Rosenbaum JL. The *Chlamydomonas* kinesin-like  
948 protein FLA10 is involved in motility associated with the flagellar membrane. *J Cell Biol.*  
949 1995;131:1517-27.
- 950 21. Pazour GJ, Wilkerson CG, Witman GB. A dynein light chain is essential for the  
951 retrograde particle movement of intraflagellar transport (IFT). *J Cell Biol.* 1998;141:979-  
952 92.
- 953 22. Signor D, Wedaman KP, Orozco JT, Dwyer ND, Bargmann CI, Rose LS, et al.  
954 Role of a class DHC1b dynein in retrograde transport of IFT motors and IFT raft particles  
955 along cilia but not dendrites, in chemosensory neurons of living *Caenorhabditis elegans*.  
956 *JCellBiol.* 1999;147(3):519-30.
- 957 23. Porter ME, Bower R, Knott JA, Byrd P, Dentler W. Cytoplasmic dynein heavy  
958 chain 1b is required for flagellar assembly in *Chlamydomonas*. *Mol Biol Cell.*  
959 1999;10:693-712.
- 960 24. Niwa S, Nakajima K, Miki H, Minato Y, Wang D, Hirokawa N. KIF19A is a  
961 microtubule-depolymerizing kinesin for ciliary length control. *Dev Cell.* 2012;23(6):1167-  
962 75. doi: 10.1016/j.devcel.2012.10.016. PubMed PMID: 23168168.
- 963 25. Vasudevan KK, Jiang YY, Lechtreck KF, Kushida Y, Alford LM, Sale WS, et al.  
964 Kinesin-13 regulates the quantity and quality of tubulin inside cilia. *Mol Biol Cell.*  
965 2015;26(3):478-94. doi: 10.1091/mbc.E14-09-1354. PubMed PMID: 25501369.
- 966 26. Piao T, Luo M, Wang L, Guo Y, Li D, Li P, et al. A microtubule depolymerizing  
967 kinesin functions during both flagellar disassembly and flagellar assembly in  
968 *Chlamydomonas*. *Proc Natl Acad Sci U S A.* 2009;106(12):4713-8. Epub 2009/03/07.  
969 doi: 10.1073/pnas.0808671106. PubMed PMID: 19264963; PubMed Central PMCID:  
970 PMC2660737.

- 971 27. Wang L, Piao T, Cao M, Qin T, Huang L, Deng H, et al. Flagellar regeneration  
972 requires cytoplasmic microtubule depolymerization and kinesin-13. *J Cell Sci.* 2013.  
973 Epub 2013/02/19. doi: 10.1242/jcs.124255. PubMed PMID: 23418346.
- 974 28. Hu Z, Liang Y, Meng D, Wang L, Pan J. Microtubule-depolymerizing kinesins in  
975 the regulation of assembly, disassembly, and length of cilia and flagella. *Int Rev Cell Mol*  
976 *Biol.* 2015;317:241-65. Epub 2015/05/27. doi: 10.1016/bs.ircmb.2015.01.008. PubMed  
977 PMID: 26008787.
- 978 29. Kubo T, Hirono M, Aikawa T, Kamiya R, Witman GB. Reduced tubulin  
979 polyglutamylation suppresses flagellar shortness in *Chlamydomonas*. *Mol Biol Cell.*  
980 2015;26(15):2810-22. doi: 10.1091/mbc.E15-03-0182. PubMed PMID: 26085508;  
981 PubMed Central PMCID: PMCPMC4571340.
- 982 30. Huang K, Diener DR, Rosenbaum JL. The ubiquitin conjugation system is  
983 involved in the disassembly of cilia and flagella. *J Cell Biol.* 2009;186(4):601-13. Epub  
984 2009/08/26. doi: 10.1083/jcb.200903066. PubMed PMID: 19704024; PubMed Central  
985 PMCID: PMC2733750.
- 986 31. Wang Q, Peng Z, Long H, Deng X, Huang K. Poly-ubiquitylation of alpha-tubulin  
987 at K304 is required for flagellar disassembly in *Chlamydomonas*. *J Cell Sci.* 2019. Epub  
988 2019/02/16. doi: 10.1242/jcs.229047. PubMed PMID: 30765466.
- 989 32. Liang Y, Meng D, Zhu B, Pan J. Mechanism of ciliary disassembly. *Cellular and*  
990 *molecular life sciences : CMLS.* 2016;73(9):1787-802. doi: 10.1007/s00018-016-2148-7.  
991 PubMed PMID: 26869233.
- 992 33. Marshall WF, Rosenbaum JL. Intraflagellar transport balances continuous  
993 turnover of outer doublet microtubules: implications for flagellar length control. *J Cell*  
994 *Biol.* 2001;155(3):405-14. Epub 2001/10/31. doi: 10.1083/jcb.200106141. PubMed  
995 PMID: 11684707; PubMed Central PMCID: PMC2150833.
- 996 34. Engel BD, Ludington WB, Marshall WF. Intraflagellar transport particle size  
997 scales inversely with flagellar length: revisiting the balance-point length control model. *J*  
998 *Cell Biol.* 2009;187(1):81-9. Epub 2009/10/07. doi: 10.1083/jcb.200812084. PubMed  
999 PMID: 19805630; PubMed Central PMCID: PMC2762100.
- 1000 35. Ludington WB, Wemmer KA, Lechtreck KF, Witman GB, Marshall WF.  
1001 Avalanche-like behavior in ciliary import. *Proc Natl Acad Sci U S A.* 2013;110(10):3925-  
1002 30. Epub 2013/02/23. doi: 10.1073/pnas.1217354110. PubMed PMID: 23431147.
- 1003 36. Pan J, Snell WJ. *Chlamydomonas* shortens its flagella by activating axonemal  
1004 disassembly, stimulating IFT particle trafficking, and blocking anterograde cargo loading.  
1005 *Dev Cell.* 2005;9(3):431-8. PubMed PMID: 16139231.
- 1006 37. Hilton LK, Gunawardane K, Kim JW, Schwarz MC, Quarmby LM. The kinases  
1007 LF4 and CNK2 control ciliary length by feedback regulation of assembly and  
1008 disassembly rates. *Curr Biol.* 2013;23(22):2208-14. doi: 10.1016/j.cub.2013.09.038.  
1009 PubMed PMID: 24184104.



- 1010 38. Broekhuis JR, Verhey KJ, Jansen G. Regulation of cilium length and intraflagellar  
1011 transport by the RCK-kinases ICK and MOK in renal epithelial cells. *PLoS One*.  
1012 2014;9(9):e108470. doi: 10.1371/journal.pone.0108470. PubMed PMID: 25243405;  
1013 PubMed Central PMCID: PMC4171540.
- 1014 39. Berman SA, Wilson NF, Haas NA, Lefebvre PA. A novel MAP kinase regulates  
1015 flagellar length in *Chlamydomonas*. *Curr Biol*. 2003;13(13):1145-9. Epub 2003/07/05.  
1016 PubMed PMID: 12842015.
- 1017 40. Wang Y, Ren Y, Pan J. Regulation of flagellar assembly and length in  
1018 *Chlamydomonas* by LF4, a MAPK-related kinase. *FASEB J*. 2019:fj201802375RR. Epub  
1019 2019/02/23. doi: 10.1096/fj.201802375RR. PubMed PMID: 30794426.
- 1020 41. Burghoorn J, Dekkers MP, Rademakers S, de Jong T, Willemsen R, Jansen G.  
1021 Mutation of the MAP kinase DYF-5 affects docking and undocking of kinesin-2 motors  
1022 and reduces their speed in the cilia of *Caenorhabditis elegans*. *Proc Natl Acad Sci U S*  
1023 *A*. 2007;104(17):7157-62. Epub 2007/04/11. doi: 10.1073/pnas.0606974104. PubMed  
1024 PMID: 17420466; PubMed Central PMCID: PMC1855366.
- 1025 42. Chaya T, Omori Y, Kuwahara R, Furukawa T. ICK is essential for cell type-  
1026 specific ciliogenesis and the regulation of ciliary transport. *EMBO J*. 2014;33(11):1227-  
1027 42. doi: 10.1002/embj.201488175. PubMed PMID: 24797473; PubMed Central PMCID:  
1028 PMC4198026.
- 1029 43. Yang Y, Roine N, Makela TP. CCRK depletion inhibits glioblastoma cell  
1030 proliferation in a cilium-dependent manner. *EMBO reports*. 2013;14(8):741-7. doi:  
1031 10.1038/embor.2013.80. PubMed PMID: 23743448; PubMed Central PMCID:  
1032 PMC43736126.
- 1033 44. Bengs F, Scholz A, Kuhn D, Wiese M. LmxMPK9, a mitogen-activated protein  
1034 kinase homologue affects flagellar length in *Leishmania mexicana*. *Mol Microbiol*.  
1035 2005;55(5):1606-15. Epub 2005/02/22. doi: 10.1111/j.1365-2958.2005.04498.x. PubMed  
1036 PMID: 15720564.
- 1037 45. Chen N, Mah A, Blacque OE, Chu J, Phgora K, Bakhoun MW, et al.  
1038 Identification of ciliary and ciliopathy genes in *Caenorhabditis elegans* through  
1039 comparative genomics. *Genome biology*. 2006;7(12):R126. Epub 2006/12/26. doi:  
1040 10.1186/gb-2006-7-12-r126. PubMed PMID: 17187676; PubMed Central PMCID:  
1041 PMC1794439.
- 1042 46. Yi P, Xie C, Ou G. The kinases male germ cell-associated kinase and cell cycle-  
1043 related kinase regulate kinesin-2 motility in *Caenorhabditis elegans* neuronal cilia.  
1044 *Traffic*. 2018;19(7):522-35. Epub 2018/04/15. doi: 10.1111/tra.12572. PubMed PMID:  
1045 29655266.
- 1046 47. Tam LW, Wilson NF, Lefebvre PA. A CDK-related kinase regulates the length  
1047 and assembly of flagella in *Chlamydomonas*. *J Cell Biol*. 2007;176(6):819-29. Epub  
1048 2007/03/14. doi: 10.1083/jcb.200610022. PubMed PMID: 17353359; PubMed Central  
1049 PMCID: PMC2064056.

- 1050 48. Phirke P, Efimenko E, Mohan S, Burghoorn J, Crona F, Bakhoun MW, et al.  
1051 Transcriptional profiling of *C. elegans* DAF-19 uncovers a ciliary base-associated protein  
1052 and a CDK/CCRK/LF2p-related kinase required for intraflagellar transport. *Dev Biol.*  
1053 2011;357(1):235-47. doi: 10.1016/j.ydbio.2011.06.028. PubMed PMID: 21740898;  
1054 PubMed Central PMCID: PMC3888451.
- 1055 49. Bradley BA, Quarmby LM. A NIMA-related kinase, Cnk2p, regulates both  
1056 flagellar length and cell size in *Chlamydomonas*. *J Cell Sci.* 2005;118(Pt 15):3317-26.  
1057 PubMed PMID: 16030138.
- 1058 50. Wloga D, Camba A, Rogowski K, Manning G, Jerka-Dziadosz M, Gaertig J.  
1059 Members of the NIMA-related kinase family promote disassembly of cilia by multiple  
1060 mechanisms. *Mol Biol Cell.* 2006;17(6):2799-810. Epub 2006/04/14. doi:  
1061 10.1091/mbc.E05-05-0450. PubMed PMID: 16611747; PubMed Central PMCID:  
1062 PMC1474788.
- 1063 51. Meng D, Pan J. A NIMA-related kinase, CNK4, regulates ciliary stability and  
1064 length. *Mol Biol Cell.* 2016;27(5):838-47. doi: 10.1091/mbc.E15-10-0707. PubMed PMID:  
1065 26764095; PubMed Central PMCID: PMC4803309.
- 1066 52. Lin H, Zhang Z, Guo S, Chen F, Kessler JM, Wang YM, et al. A NIMA-Related  
1067 Kinase Suppresses the Flagellar Instability Associated with the Loss of Multiple  
1068 Axonemal Structures. *PLoS Genet.* 2015;11(9):e1005508. Epub 2015/09/09. doi:  
1069 10.1371/journal.pgen.1005508. PubMed PMID: 26348919; PubMed Central PMCID:  
1070 PMC4562644.
- 1071 53. Tam LW, Ranum PT, Lefebvre PA. CDKL5 regulates flagellar length and  
1072 localizes to the base of the flagella in *Chlamydomonas*. *Mol Biol Cell.* 2013;24(5):588-  
1073 600. Epub 2013/01/04. doi: 10.1091/mbc.E12-10-0718. PubMed PMID: 23283985;  
1074 PubMed Central PMCID: PMC3583663.
- 1075 54. Lefebvre PA, Nordstrom SA, Moulder JE, Rosenbaum JL. Flagellar elongation  
1076 and shortening in *Chlamydomonas*. IV. Effects of flagellar detachment, regeneration,  
1077 and resorption on the induction of flagellar protein synthesis. *J Cell Biol.* 1978;78(1):8-  
1078 27. Epub 1978/07/01. PubMed PMID: 149796; PubMed Central PMCID: PMC2110168.
- 1079 55. Pan J, Wang Q, Snell WJ. An aurora kinase is essential for flagellar disassembly  
1080 in *Chlamydomonas*. *Dev Cell.* 2004;6(3):445-51. PubMed PMID: 15030766.
- 1081 56. Abdul-Majeed S, Moloney BC, Nauli SM. Mechanisms regulating cilia growth and  
1082 cilia function in endothelial cells. *Cellular and molecular life sciences : CMLS.*  
1083 2012;69(1):165-73. Epub 2011/06/15. doi: 10.1007/s00018-011-0744-0. PubMed PMID:  
1084 21671118.
- 1085 57. Liang YW, Zhu X, Wu Q, Pan JM. Ciliary Length Sensing Regulates IFT Entry via  
1086 Changes in FLA8/KIF3B Phosphorylation to Control Ciliary Assembly. *Current Biology.*  
1087 2018;28(15):2429-+. doi: 10.1016/j.cub.2018.05.069. PubMed PMID:  
1088 WOS:000440787800022.
- 1089 58. Maskey D, Marlin MC, Kim S, Kim S, Ong EC, Li G, et al. Cell cycle-dependent  
1090 ubiquitylation and destruction of NDE1 by CDK5-FBW7 regulates ciliary length. *EMBO J.*

- 1091 2015;34(19):2424-40. Epub 2015/07/25. doi: 10.15252/embj.201490831. PubMed PMID:  
1092 26206584; PubMed Central PMCID: PMCPMC4601663.
- 1093 59. Husson H, Moreno S, Smith LA, Smith MM, Russo RJ, Pitstick R, et al.  
1094 Reduction of ciliary length through pharmacologic or genetic inhibition of CDK5  
1095 attenuates polycystic kidney disease in a model of nephronophthisis. *Hum Mol Genet.*  
1096 2016;25(11):2245-55. Epub 2016/10/30. doi: 10.1093/hmg/ddw093. PubMed PMID:  
1097 27053712; PubMed Central PMCID: PMCPMC5081056.
- 1098 60. Liang Y, Pang Y, Wu Q, Hu Z, Han X, Xu Y, et al. FLA8/KIF3B phosphorylation  
1099 regulates kinesin-II interaction with IFT-B to control IFT entry and turnaround. *Dev Cell.*  
1100 2014;30(5):585-97. Epub 2014/09/02. doi: 10.1016/j.devcel.2014.07.019. PubMed  
1101 PMID: 25175706.
- 1102 61. Keeling J, Tsiokas L, Maskey D. Cellular Mechanisms of Ciliary Length Control.  
1103 *Cells.* 2016;5(1). Epub 2016/02/04. doi: 10.3390/cells5010006. PubMed PMID:  
1104 26840332; PubMed Central PMCID: PMCPMC4810091.
- 1105 62. Avasthi P, Marshall WF. Stages of ciliogenesis and regulation of ciliary length.  
1106 *Differentiation.* 2012;83(2):S30-42. Epub 2011/12/20. doi: 10.1016/j.diff.2011.11.015.  
1107 PubMed PMID: 22178116; PubMed Central PMCID: PMC3269565.
- 1108 63. Ludington WB, Ishikawa H, Serebrenik YV, Ritter A, Hernandez-Lopez RA,  
1109 Gunzenhauser J, et al. A systematic comparison of mathematical models for inherent  
1110 measurement of ciliary length: how a cell can measure length and volume. *Biophys J.*  
1111 2015;108(6):1361-79. doi: 10.1016/j.bpj.2014.12.051. PubMed PMID: 25809250;  
1112 PubMed Central PMCID: PMCPMC4375445.
- 1113 64. Asleson CM, Lefebvre PA. Genetic analysis of flagellar length control in  
1114 *Chlamydomonas reinhardtii*: a new long-flagella locus and extragenic suppressor  
1115 mutations. *Genetics.* 1998;148(2):693-702. Epub 1998/03/20. PubMed PMID: 9504917;  
1116 PubMed Central PMCID: PMC1459834.
- 1117 65. Wloga D, Frankel J. From molecules to morphology: cellular organization of  
1118 *Tetrahymena thermophila*. *Methods Cell Biol.* 2012;109:83-140. Epub 2012/03/27. doi:  
1119 10.1016/B978-0-12-385967-9.00005-0. PubMed PMID: 22444144.
- 1120 66. Bakowska J, Nelsen EM, Frankel J. Development of the Ciliary Pattern of the  
1121 Oral Apparatus of *Tetrahymena thermophila*. *J Protozool.* 1982;29:366-82.
- 1122 67. Nelsen EM, Frankel J, Martel E. Development of the ciliature of *Tetrahymena*  
1123 *thermophila*. I. Temporal coordination with oral development. *Dev Biol.* 1981;88:27-38.
- 1124 68. Hanks SK, Hunter T. Protein kinases 6. The eukaryotic protein kinase  
1125 superfamily: kinase (catalytic) domain structure and classification. *FASEB J.*  
1126 1995;9(8):576-96. Epub 1995/05/01. PubMed PMID: 7768349.
- 1127 69. Wolfe J, Grimes GW. Tip transformaton in *Tetrahymena*: morphogenetic  
1128 response to interactions between mating types. *J Protozool.* 1979;26:82-9.

- 1129 70. Kiersnowska M, Kaczanowski A. Inhibition of oral morphogenesis during  
1130 conjugation of *Tetrahymena thermophila* and its resumption after cell separation. *Eur J*  
1131 *Protistology*. 1993;29:359-69.
- 1132 71. Pucciarelli S, Ballarini P, Sparvoli D, Barchetta S, Yu T, Detrich HW, 3rd, et al.  
1133 Distinct functional roles of beta-tubulin isoforms in microtubule arrays of *Tetrahymena*  
1134 *thermophila*, a model single-celled organism. *PLoS One*. 2012;7(6):e39694. doi:  
1135 10.1371/journal.pone.0039694. PubMed PMID: 22745812; PubMed Central PMCID:  
1136 PMC3382179.
- 1137 72. Xiong J, Lu X, Zhou Z, Chang Y, Yuan D, Tian M, et al. Transcriptome analysis  
1138 of the model protozoan, *Tetrahymena thermophila*, using Deep RNA sequencing. *PLoS*  
1139 *One*. 2012;7(2):e30630. Epub 2012/02/22. doi: 10.1371/journal.pone.0030630. PubMed  
1140 PMID: 22347391; PubMed Central PMCID: PMC3274533.
- 1141 73. Shang Y, Song X, Bowen J, Corstanje R, Gao Y, Gaertig J, et al. A robust  
1142 inducible-repressible promoter greatly facilitates gene knockouts, conditional expression,  
1143 and overexpression of homologous and heterologous genes in *Tetrahymena*  
1144 *thermophila*. *Proc Natl Acad Sci U S A*. 2002;99(6):3734-9. Epub 2002/03/14. doi:  
1145 10.1073/pnas.052016199. PubMed PMID: 11891286; PubMed Central PMCID:  
1146 PMC122593.
- 1147 74. Brown JM, Hardin C, Gaertig J. Rotokinesis, a novel phenomenon of cell  
1148 locomotion-assisted cytokinesis in the ciliate *Tetrahymena thermophila*. *Cell Biol Int*.  
1149 1999;23(12):841-8. Epub 2000/04/25. doi: 10.1006/cbir.1999.0480. PubMed PMID:  
1150 10772758.
- 1151 75. Jain RK, Joyce PB, Molinete M, Halban PA, Gorr SU. Oligomerization of green  
1152 fluorescent protein in the secretory pathway of endocrine cells. *Biochem J*. 2001;360(Pt  
1153 3):645-9. Epub 2001/12/12. PubMed PMID: 11736655; PubMed Central PMCID:  
1154 PMCPMC1222268.
- 1155 76. Jiang YY, Lechtreck K, Gaertig J. Total internal reflection fluorescence  
1156 microscopy of intraflagellar transport in *Tetrahymena thermophila*. *Methods Cell Biol*.  
1157 2015;127:445-56. Epub 2015/04/04. doi: 10.1016/bs.mcb.2015.01.001. PubMed PMID:  
1158 25837403; PubMed Central PMCID: PMCPMC5301313.
- 1159 77. Fan ZC, Behal RH, Geimer S, Wang Z, Williamson SM, Zhang H, et al.  
1160 *Chlamydomonas* IFT70/CrDYF-1 is a core component of IFT particle complex B and is  
1161 required for flagellar assembly. *Mol Biol Cell*. 2010;21(15):2696-706. Epub 2010/06/11.  
1162 doi: 10.1091/mbc.E10-03-0191. PubMed PMID: 20534810; PubMed Central PMCID:  
1163 PMC2912355.
- 1164 78. Piperno G, Mead K. Transport of a novel complex in the cytoplasmic matrix of  
1165 *Chlamydomonas* flagella. *Proc Natl Acad Sci USA*. 1997;94:4457-62.
- 1166 79. Cole ES, Bruns PJ. Uniparental cytogamy: A novel method for bringing  
1167 micronuclear mutations of tetrahymena into homozygous macronuclear expression with  
1168 precocious sexual maturity. *Genetics*. 1992;132:1017-31.

- 1169 80. Artz JD, Wernimont AK, Allali-Hassani A, Zhao Y, Amani M, Lin YH, et al. The  
1170 *Cryptosporidium parvum* kinome. *BMC genomics*. 2011;12:478. Epub 2011/10/04. doi:  
1171 10.1186/1471-2164-12-478. PubMed PMID: 21962082; PubMed Central PMCID:  
1172 PMCPMC3227725.
- 1173 81. Fiser A, Do RK, Sali A. Modeling of loops in protein structures. *Protein Sci*.  
1174 2000;9(9):1753-73. Epub 2000/10/25. doi: 10.1110/ps.9.9.1753. PubMed PMID:  
1175 11045621; PubMed Central PMCID: PMCPMC2144714.
- 1176 82. Torkamani A, Kannan N, Taylor SS, Schork NJ. Congenital disease SNPs target  
1177 lineage specific structural elements in protein kinases. *Proc Natl Acad Sci U S A*.  
1178 2008;105(26):9011-6. Epub 2008/06/27. doi: 10.1073/pnas.0802403105. PubMed PMID:  
1179 18579784; PubMed Central PMCID: PMCPMC2449356.
- 1180 83. Jiang YY, Maier W, Baumeister R, Minevich G, Joachimiak E, Ruan Z, et al. The  
1181 Hippo Pathway Maintains the Equatorial Division Plane in the Ciliate *Tetrahymena*.  
1182 *Genetics*. 2017;206(2):873-88. Epub 2017/04/18. doi: 10.1534/genetics.117.200766.  
1183 PubMed PMID: 28413159; PubMed Central PMCID: PMCPMC5499192.
- 1184 84. Ohnishi J, Mizoguchi H, Takeno S, Ikeda M. Characterization of mutations  
1185 induced by N-methyl-N'-nitro-N-nitrosoguanidine in an industrial *Corynebacterium*  
1186 *glutamicum* strain. *Mutat Res*. 2008;649(1-2):239-44. doi:  
1187 10.1016/j.mrgentox.2007.10.003. PubMed PMID: 18037338.
- 1188 85. McSkimming DI, Rasheed K, Kannan N. Classifying kinase conformations using  
1189 a machine learning approach. *BMC bioinformatics*. 2017;18(1):86. Epub 2017/02/06. doi:  
1190 10.1186/s12859-017-1506-2. PubMed PMID: 28152981; PubMed Central PMCID:  
1191 PMCPMC5290640.
- 1192 86. Talevich E, Kannan N. Structural and evolutionary adaptation of rhoptyr kinases  
1193 and pseudokinases, a family of coccidian virulence factors. *BMC Evol Biol*. 2013;13:117.  
1194 Epub 2013/06/08. doi: 10.1186/1471-2148-13-117. PubMed PMID: 23742205; PubMed  
1195 Central PMCID: PMCPMC3682881.
- 1196 87. Pratt DJ, Bentley J, Jewsbury P, Boyle FT, Endicott JA, Noble ME. Dissecting the  
1197 determinants of cyclin-dependent kinase 2 and cyclin-dependent kinase 4 inhibitor  
1198 selectivity. *Journal of medicinal chemistry*. 2006;49(18):5470-7. Epub 2006/09/01. doi:  
1199 10.1021/jm060216x. PubMed PMID: 16942020.
- 1200 88. Drozdetskiy A, Cole C, Procter J, Barton GJ. JPred4: a protein secondary  
1201 structure prediction server. *Nucleic Acids Res*. 2015;43(W1):W389-94. Epub  
1202 2015/04/18. doi: 10.1093/nar/gkv332. PubMed PMID: 25883141; PubMed Central  
1203 PMCID: PMCPMC4489285.
- 1204 89. Orias E, Rasmussen L. Dual capacity for nutrient uptake in tetrahymena. IV.  
1205 growth without food vacuoles. *Exp Cell Res*. 1976;102:127-37.
- 1206 90. Irniger S. The *Ime2* protein kinase family in fungi: more duties than just meiosis.  
1207 *Mol Microbiol*. 2011;80(1):1-13. Epub 2011/02/11. doi: 10.1111/j.1365-  
1208 2958.2011.07575.x. PubMed PMID: 21306447.

- 1209 91. Aury JM, Jaillon O, Duret L, Noel B, Jubin C, Porcel BM, et al. Global trends of  
1210 whole-genome duplications revealed by the ciliate *Paramecium tetraurelia*. *Nature*.  
1211 2006;444(7116):171-8. PubMed PMID: 17086204.
- 1212 92. Mitchell DR. The evolution of eukaryotic cilia and flagella as motile and sensory  
1213 organelles. *Advances in experimental medicine and biology*. 2007;607:130-40. Epub  
1214 2007/11/06. doi: 10.1007/978-0-387-74021-8\_11. PubMed PMID: 17977465; PubMed  
1215 Central PMCID: PMC3322410.
- 1216 93. Snouffer A, Brown D, Lee H, Walsh J, Lupu F, Norman R, et al. Cell Cycle-  
1217 Related Kinase (CCRK) regulates ciliogenesis and Hedgehog signaling in mice. *PLoS*  
1218 *Genet*. 2017;13(8):e1006912. Epub 2017/08/18. doi: 10.1371/journal.pgen.1006912.  
1219 PubMed PMID: 28817564; PubMed Central PMCID: PMC5574612.
- 1220 94. Barsel SE, Wexler DE, Lefebvre PA. Genetic analysis of long-flagella mutants of  
1221 *Chlamydomonas reinhardtii*. *Genetics*. 1988;118:637-48.
- 1222 95. Omori Y, Chaya T, Katoh K, Kajimura N, Sato S, Muraoka K, et al. Negative  
1223 regulation of ciliary length by ciliary male germ cell-associated kinase (Mak) is required  
1224 for retinal photoreceptor survival. *Proc Natl Acad Sci U S A*. 2010;107(52):22671-6.  
1225 Epub 2010/12/15. doi: 10.1073/pnas.1009437108. PubMed PMID: 21148103; PubMed  
1226 Central PMCID: PMC3012466.
- 1227 96. Brown JM, Marsala C, Kosoy R, Gaertig J. Kinesin-II is preferentially targeted to  
1228 assembling cilia and is required for ciliogenesis and normal cytokinesis in *Tetrahymena*.  
1229 *Mol Biol Cell*. 1999;10(10):3081-96. Epub 1999/10/08. PubMed PMID: 10512852;  
1230 PubMed Central PMCID: PMC25561.
- 1231 97. Tsao CC, Gorovsky MA. Different effects of tetrahymena IFT172 domains on  
1232 anterograde and retrograde intraflagellar transport. *Mol Biol Cell*. 2008;19(4):1450-61.  
1233 PubMed PMID: 18199688.
- 1234 98. Brown JM, Fine NA, Pandiyan G, Thazhath R, Gaertig J. Hypoxia regulates  
1235 assembly of cilia in suppressors of *Tetrahymena* lacking an intraflagellar transport  
1236 subunit gene. *Mol Biol Cell*. 2003;14(8):3192-207. Epub 2003/08/20. doi:  
1237 10.1091/mbc.E03-03-0166. PubMed PMID: 12925756; PubMed Central PMCID:  
1238 PMC181560.
- 1239 99. Rajagopalan V, Subramanian A, Wilkes DE, Pennock DG, Asai DJ. Dynein-2  
1240 affects the regulation of ciliary length but is not required for ciliogenesis in *Tetrahymena*  
1241 *thermophila*. *Mol Biol Cell*. 2009;20(2):708-20. Epub 2008/11/21. doi: 10.1091/mbc.E08-  
1242 07-0746. PubMed PMID: 19019986; PubMed Central PMCID: PMC5574612.
- 1243 100. Dentler W. Intraflagellar transport (IFT) during assembly and disassembly of  
1244 *Chlamydomonas* flagella. *J Cell Biol*. 2005;170(4):649-59. Epub 2005/08/17. doi:  
1245 10.1083/jcb.200412021. PubMed PMID: 16103230; PubMed Central PMCID:  
1246 PMC5574612.
- 1247 101. Subramanian R, Ti SC, Tan L, Darst SA, Kapoor TM. Marking and measuring  
1248 single microtubules by PRC1 and kinesin-4. *Cell*. 2013;154(2):377-90. Epub 2013/07/23.

- 1249 doi: 10.1016/j.cell.2013.06.021. PubMed PMID: 23870126; PubMed Central PMCID:  
1250 PMCPMC3761943.
- 1251 102. Varga V, Helenius J, Tanaka K, Hyman AA, Tanaka TU, Howard J. Yeast  
1252 kinesin-8 depolymerizes microtubules in a length-dependent manner. *Nat Cell Biol.*  
1253 2006;8(9):957-62. Epub 2006/08/15. doi: 10.1038/ncb1462. PubMed PMID: 16906145.
- 1254 103. Wingfield JL, Mengoni I, Bomberger H, Jiang YY, Walsh JD, Brown JM, et al. IFT  
1255 trains in different stages of assembly queue at the ciliary base for consecutive release  
1256 into the cilium. *Elife.* 2017;6. Epub 2017/06/01. doi: 10.7554/eLife.26609. PubMed  
1257 PMID: 28562242; PubMed Central PMCID: PMCPMC5451262.
- 1258 104. Fu Z, Larson KA, Chitta RK, Parker SA, Turk BE, Lawrence MW, et al.  
1259 Identification of yin-yang regulators and a phosphorylation consensus for male germ cell-  
1260 associated kinase (MAK)-related kinase. *Molecular and cellular biology.*  
1261 2006;26(22):8639-54. Epub 2006/09/07. doi: 10.1128/MCB.00816-06. PubMed PMID:  
1262 16954377; PubMed Central PMCID: PMC1636783.
- 1263 105. Fu Z, Schroeder MJ, Shabanowitz J, Kaldis P, Togawa K, Rustgi AK, et al.  
1264 Activation of a nuclear Cdc2-related kinase within a mitogen-activated protein kinase-like  
1265 TDY motif by autophosphorylation and cyclin-dependent protein kinase-activating  
1266 kinase. *Molecular and cellular biology.* 2005;25(14):6047-64. Epub 2005/07/01. doi:  
1267 10.1128/MCB.25.14.6047-6064.2005. PubMed PMID: 15988018; PubMed Central  
1268 PMCID: PMC1168834.
- 1269 106. Wu D, Chapman JR, Wang L, Harris TE, Shabanowitz J, Hunt DF, et al.  
1270 Intestinal cell kinase (ICK) promotes activation of mTOR complex 1 (mTORC1) through  
1271 phosphorylation of Raptor Thr-908. *J Biol Chem.* 2012;287(15):12510-9. Epub  
1272 2012/02/24. doi: 10.1074/jbc.M111.302117. PubMed PMID: 22356909; PubMed Central  
1273 PMCID: PMC3321000.
- 1274 107. Wang LY, Kung HJ. Male germ cell-associated kinase is overexpressed in  
1275 prostate cancer cells and causes mitotic defects via deregulation of APC/CCDH1.  
1276 *Oncogene.* 2012;31(24):2907-18. Epub 2011/10/12. doi: 10.1038/onc.2011.464.  
1277 PubMed PMID: 21986944; PubMed Central PMCID: PMCPMC3566783.
- 1278 108. Jeanmougin F, Thompson JD, Gouy M, Higgins DG, Gibson TJ. Multiple  
1279 sequence alignment with Clustal X. *Trends Biochem Sci.* 1998;23(10):403-5. PubMed  
1280 PMID: 9810230.
- 1281 109. Galtier N, Gouy M, Gautier C. SEAVIEW and PHYLO\_WIN: two graphic tools for  
1282 sequence alignment and molecular phylogeny. *Comput Appl Biosci.* 1996;12(6):543-8.  
1283 PubMed PMID: 9021275.
- 1284 110. Felsenstein J. PHYLIP (Phylogeny Inference Package) version 3.6. Distributed  
1285 by the author. Department of Genome Sciences, University of Washington, Seattle.  
1286 2005.
- 1287 111. Gorovsky MA. Studies on nuclear structure and function in *Tetrahymena*  
1288 pyriformis II Isolation of macro- and micronuclei. *JCell Biol.* 1970;47:619-30.

- 1289 112. Dave D, Wloga D, Gaertig J. Manipulating ciliary protein-encoding genes in  
1290 *Tetrahymena thermophila*. *Methods Cell Biol.* 2009;93:1-20. Epub 2009/01/01. doi:  
1291 10.1016/S0091-679X(08)93001-6. PubMed PMID: 20409809.
- 1292 113. Gaertig J, Wloga D, Vasudevan KK, Guha M, Dentler WL. Discovery and  
1293 functional evaluation of ciliary proteins in *Tetrahymena thermophila*. In: Marshall WF,  
1294 editor. *Cilia*, part B. *Methods in Enzymology.* 2552013.
- 1295 114. Busch CJ, Vogt A, Mochizuki K. Establishment of a Cre/loxP recombination  
1296 system for N-terminal epitope tagging of genes in *Tetrahymena*. *BMC microbiology.*  
1297 2010;10:191. Epub 2010/07/16. doi: 10.1186/1471-2180-10-191. PubMed PMID:  
1298 20626890; PubMed Central PMCID: PMC2912859.
- 1299 115. Urbanska P, Song K, Joachimiak E, Krzemien-Ojak L, Koprowski P, Hennessey  
1300 T, et al. The CSC proteins FAP61 and FAP251 build the basal substructures of radial  
1301 spoke 3 in cilia. *Mol Biol Cell.* 2015;26(8):1463-75. doi: 10.1091/mbc.E14-11-1545.  
1302 PubMed PMID: 25694453.
- 1303 116. Iwamoto M, Mori C, Hiraoka Y, Haraguchi T. Puromycin resistance gene as an  
1304 effective selection marker for ciliate *Tetrahymena*. *Gene.* 2014;534(2):249-55. Epub  
1305 2013/11/05. doi: 10.1016/j.gene.2013.10.049. PubMed PMID: 24185080.
- 1306 117. Mochizuki K. High efficiency transformation of *Tetrahymena* using a codon-  
1307 optimized neomycin resistance gene. *Gene.* 2008;425(1-2):79-83. Epub 2008/09/09. doi:  
1308 S0378-1119(08)00394-6 [pii]  
1309 10.1016/j.gene.2008.08.007. PubMed PMID: 18775482.
- 1310 118. Gaertig J, Gao Y, Tishgarten T, Clark TG, Dickerson HW. Surface display of a  
1311 parasite antigen in the ciliate *Tetrahymena thermophila*. *Nat Biotechnol.* 1999;17(5):462-  
1312 5. Epub 1999/05/20. doi: 10.1038/8638. PubMed PMID: 10331805.
- 1313 119. Dave D, Wloga D, Sharma N, Gaertig J. DYF-1 Is required for assembly of the  
1314 axoneme in *Tetrahymena thermophila*. *Eukaryot Cell.* 2009;8(9):1397-406. Epub  
1315 2009/07/08. doi: 10.1128/EC.00378-08. PubMed PMID: 19581442; PubMed Central  
1316 PMCID: PMC2747827.
- 1317 120. Kataoka K, Schoeberl UE, Mochizuki K. Modules for C-terminal epitope tagging  
1318 of *Tetrahymena* genes. *Journal of microbiological methods.* 2010;82(3):342-6. Epub  
1319 2010/07/14. doi: 10.1016/j.mimet.2010.07.009. PubMed PMID: 20624430; PubMed  
1320 Central PMCID: PMC2935961.
- 1321 121. Bruns PJ, Brussard TB, Kavka AB. Isolation of homozygous mutants after  
1322 induced self-fertilization in *Tetrahymena*. *Proc Natl Acad Sci U S A.* 1976;73(9):3243-7.  
1323 PubMed PMID: 823548; PubMed Central PMCID: PMCPMC430993.
- 1324 122. Schindelin J, Arganda-Carreras I, Frise E, Kaynig V, Longair M, Pietzsch T, et al.  
1325 Fiji: an open-source platform for biological-image analysis. *Nature methods.*  
1326 2012;9(7):676-82. Epub 2012/06/30. doi: 10.1038/nmeth.2019. PubMed PMID:  
1327 22743772; PubMed Central PMCID: PMCPMC3855844.



- 1328 123. Candiano G, Bruschi M, Musante L, Santucci L, Ghiggeri GM, Carnemolla B, et  
1329 al. Blue silver: a very sensitive colloidal Coomassie G-250 staining for proteome  
1330 analysis. *Electrophoresis*. 2004;25(9):1327-33. Epub 2004/06/03. doi:  
1331 10.1002/elps.200305844. PubMed PMID: 15174055.
- 1332 124. Dryl S. Antigenic transformation in *Paramecium aurelia* after homologous  
1333 antiserum treatment during autogamy and conjugation. *J Protozool*. 1959;6:25.
- 1334 125. Gaertig J, Thatcher TH, Gu L, Gorovsky MA. Electroporation-mediated  
1335 replacement of a positively and negatively selectable b-tubulin gene in *Tetrahymena*  
1336 *thermophila*. *Proc Natl Acad Sci USA*. 1994;91:4549-53.
- 1337 126. Eisen JA, Coyne RS, Wu M, Wu D, Thiagarajan M, Wortman JR, et al.  
1338 Macronuclear genome sequence of the ciliate *Tetrahymena thermophila*, a model  
1339 eukaryote. *PLoS Biol*. 2006;4(9):e286. Epub 2006/08/29. doi:  
1340 10.1371/journal.pbio.0040286. PubMed PMID: 16933976; PubMed Central PMCID:  
1341 PMC1557398.
- 1342 127. Hamilton EP, Kapusta A, Huvos PE, Bidwell SL, Zafar N, Tang H, et al. Structure  
1343 of the germline genome of *Tetrahymena thermophila* and relationship to the massively  
1344 rearranged somatic genome. *Elife*. 2016;5. doi: 10.7554/eLife.19090. PubMed PMID:  
1345 27892853.
- 1346 128. Maier W, Moos K, Seifert M, Baumeister R. Mutation Identification in Model  
1347 Organism Genomes [Computer Software]: SourceForge.net; 2014. 0.1.8:[Available from:  
1348 <https://sourceforge.net/projects/mimodd/>]. 2014.
- 1349 129. Kannan N, Taylor SS, Zhai Y, Venter JC, Manning G. Structural and functional  
1350 diversity of the microbial kinome. *PLoS Biol*. 2007;5(3):e17. Epub 2007/03/16. doi:  
1351 10.1371/journal.pbio.0050017. PubMed PMID: 17355172; PubMed Central PMCID:  
1352 PMCPMC1821047.
- 1353 130. Talevich E, Mirza A, Kannan N. Structural and evolutionary divergence of  
1354 eukaryotic protein kinases in Apicomplexa. *BMC Evol Biol*. 2011;11:321. Epub  
1355 2011/11/04. doi: 10.1186/1471-2148-11-321. PubMed PMID: 22047078; PubMed  
1356 Central PMCID: PMCPMC3239843.
- 1357 131. Neuwald AF. Rapid detection, classification and accurate alignment of up to a  
1358 million or more related protein sequences. *Bioinformatics*. 2009;25(15):1869-75. Epub  
1359 2009/06/10. doi: 10.1093/bioinformatics/btp342. PubMed PMID: 19505947; PubMed  
1360 Central PMCID: PMCPMC2732367.
- 1361 132. Eddy SR. Accelerated Profile HMM Searches. *PLoS Comput Biol*.  
1362 2011;7(10):e1002195. Epub 2011/11/01. doi: 10.1371/journal.pcbi.1002195. PubMed  
1363 PMID: 22039361; PubMed Central PMCID: PMCPMC3197634.
- 1364 133. Manning G, Whyte DB, Martinez R, Hunter T, Sudarsanam S. The protein kinase  
1365 complement of the human genome. *Science*. 2002;298(5600):1912-34. Epub  
1366 2002/12/10. doi: 10.1126/science.1075762. PubMed PMID: 12471243.

- 1367 134. Madden T. The BLAST Sequence Analysis Tool. In: McEntyre J, Ostell J, editors.  
1368 The NCBI Handbook [Internet]. Bethesda (MD): National Center for Biotechnology  
1369 Information (US); 2002.
- 1370 135. Schrodinger LLC. The PyMOL Molecular Graphics System, Version 1.8. 2015.
- 1371 136. Zhang Y. I-TASSER: fully automated protein structure prediction in CASP8.  
1372 Proteins. 2009;77 Suppl 9:100-13. Epub 2009/09/22. doi: 10.1002/prot.22588. PubMed  
1373 PMID: 19768687; PubMed Central PMCID: PMC2782770.
- 1374 137. Roy A, Yang J, Zhang Y. COFACTOR: an accurate comparative algorithm for  
1375 structure-based protein function annotation. Nucleic Acids Res. 2012;40(Web Server  
1376 issue):W471-7. Epub 2012/05/10. doi: 10.1093/nar/gks372. PubMed PMID: 22570420;  
1377 PubMed Central PMCID: PMC3394312.
- 1378 138. Yang J, Zhang Y. I-TASSER server: new development for protein structure and  
1379 function predictions. Nucleic Acids Res. 2015;43(W1):W174-81. Epub 2015/04/18. doi:  
1380 10.1093/nar/gkv342. PubMed PMID: 25883148; PubMed Central PMCID:  
1381 PMC4489253.
- 1382

## 1383 **Figure legends**

1384

1385 **Figure 1. LF4A regulates cilia length and number in *Tetrahymena*.** (A) A  
1386 neighbor joining phylogenetic tree of a subset of CMGC kinases. The human MAPK3  
1387 was used as an outgroup. The numbers on the branches represent bootstrap support  
1388 values above 50%. Arrows mark the two LF4/MOK homologs of *Tetrahymena*. (B and  
1389 C) A wild-type (B) and an LF4A-KO cell (C) stained with the anti-polyG antibodies to  
1390 visualize cilia (green), anti-centrin antibody 20H5 to mark the basal bodies (red) and  
1391 DAPI (blue). Arrowheads indicate the posterior-dorsal region that is less densely  
1392 ciliated in LF4A-KO. Abbreviations: oa, oral apparatus; A, anterior cell end; P,  
1393 posterior cell end. (D) (D) A box and whisker plot of locomotory cilia length. Cilia  
1394 from ten wildtype and ten LF4A-KO cells were measured. The average cilium length  
1395 for the wild type (n = 216) is 5.88  $\mu\text{m}$ , SD (standard deviation): 0.38  $\mu\text{m}$ ; LF4A-KO  
1396 (n = 367) 7.74  $\mu\text{m}$ , SD: 1.82  $\mu\text{m}$ .  $p < 0.01$ . (E) The length of cilia during  
1397 regeneration after deciliation by pH shock. Four to 6 cells, 50 - 150 cilia were used at  
1398 each time point. Asterisks (\*) indicate significant differences ( $p < 0.01$  at each  
1399 indicated time point).

1400

1401 **Figure 2. LF4A-GFP localizes to the basal bodies and along cilia, is**  
1402 **transported by IFT and affects IFT.** (A-B) A wild-type (negative control) cell (A)  
1403 and a cell expressing LF4A-GFP under the native promoter (B) were subjected to  
1404 simultaneous fixation/permeabilization (using a mixture of paraformaldehyde and  
1405 Triton X-100) and stained with the anti-GFP antibodies (red) and DAPI (blue). In the  
1406 negative control, the background red (anti-GFP) signal is in the cell body and  
1407 occasionally at the tips of cilia (A inset). LF4A-GFP is present near the basal bodies

1408 and is weakly presents along the shafts of locomotory cilia (B inset). (C) An LF4A-  
1409 GFP expressing cell that was first permeabilized (with Triton X-100) and then fixed  
1410 (with paraformaldehyde) prior to immunofluorescence. Compared to (B), the LF4A-  
1411 GFP signal remained strong near the basal bodies but is decreased in cilia. (D) A  
1412 TIRFM image of a live LF4A-GFP cell. Arrowheads indicate several basal bodies within  
1413 a locomotory row, the box highlights an example of a ciliary shaft. (E) Five  
1414 representative example kymographs obtained from the TIRFM videos of LF4A-GFP  
1415 cells. In most cilia, LF4A-GFP particles are stationary and some move with velocities  
1416 similar to IFT velocities (arrows) or diffuse (an example of a diffusion event is  
1417 marked with a red line on the duplicate of the bottom right kymograph). (F) The IFT  
1418 velocities (left) and IFT event frequencies (right) in cilia of either wild-type or LF4A-  
1419 KO cells that express DYF1-GFP. (G) The IFT velocities (left) and event frequencies  
1420 (right) in cilia of either wild-type or GFP-LF4A-overexpressing cells. Both strains were  
1421 exposed to Cd<sup>2+</sup> for 3 hours. In (F) and (G), the sample sizes are indicated, asterisks  
1422 mark significant differences (one way Anova p<0.01), error bars represent SDs. (H)  
1423 Examples of kymographs of GFP-DYF1 in cilia of either wild-type or LF4A-KO cells  
1424 corresponding to the data shown in panel F. (H') Examples of kymographs of GFP-  
1425 DYF1 in either wild-type or GFP-LF4A overproducing cells corresponding to the data  
1426 shown in panel G. Abbreviations: oa, oral apparatus; PFA, paraformaldehyde.

1427

1428 **Figure 3. Excessive LF4A kinase activity shortens cilia and decreases IFT.** (A-  
1429 C) Cells (treated with 2.5 µg/ml CdCl<sub>2</sub> for 6 hours) overexpressing either GFP (A),  
1430 GFP-LF4A (B) or GFP-LF4A<sup>F82A</sup> (C) showing GFP fluorescence (green) and labeled by  
1431 the anti-polyG tubulin antibodies (red). The shortening of cilia is evident only in the  
1432 cell expressing GFP-LF4A (B) where it is enriched at the basal bodies. GFP-LF4A<sup>F82A</sup>  
1433 accumulates at the tips of cilia (C). The insets in B-C show the green signal of GFP-

1434 LF4A alone at higher magnification. (D) GFP-LF4A-overexpressing cells after  
1435 overnight induction with  $Cd^{2+}$ , have short cilia, are large and irregular in shape,  
1436 consistent with cytokinesis defects. (E) The results of an *in vitro* kinase assay with  
1437 either GFP-LF4A or GFP-LF4<sup>F82A</sup>. Each protein was overexpressed in *Tetrahymena* and  
1438 immunoprecipitated on anti-GFP-beads. The beads were incubated with the  
1439 recombinant myelin basic protein (MBP) and ATP- $\gamma$ -S. The phosphorylated products  
1440 were detected on a western blot probed with the anti-thiophosphorylation antibody  
1441 51-8; the upper and middle panels show sections of the same blot containing  
1442 autophosphorylated GFP-LF4A and MBP, respectively. The same amounts of IP inputs  
1443 were analyzed on a western blot probed the anti-GFP antibodies and shown in the  
1444 bottom panel (WB: GFP); the lower band in the right lane likely is a proteolytic  
1445 degradation product of GFP-LF4A. (F) The lengths of locomotory cilia of cells that  
1446 overproduce (for 3 hours) either GFP, GFP-LF4A or the kinase-weak GFP-LF4A<sup>F82A</sup>.  
1447 The cilia lengths in the GFP and GFP-LF4A<sup>F82A</sup> cells were not significantly different  
1448 ( $p > 0.01$ ), while the GFP-LF4A cilia were significantly reduced ( $\sim 75\%$  of the length  
1449 of GFP controls, one way Anova test,  $p < 0.01$ ). Sample sizes are indicated, error  
1450 bars represent SDs. (G) The anterograde and retrograde IFT velocities in cilia of cells  
1451 that express IFT140-GFP and overexpress either mCherry-LF4A or mCherry-LF4A<sup>F82A</sup>.  
1452 The IFT speeds are significantly reduced in mCherry-LF4A as compared to mCherry-  
1453 LF4A<sup>F82A</sup> overexpressing cells (exposed to added  $Cd^{2+}$  for 3 hours). The sample sizes  
1454 (numbers of tracks measured) are indicated, asterisks indicate statistically significant  
1455 differences (one way Anova,  $p < 0.01$ ), error bars represent SDs. (H) Examples of  
1456 kymographs of cilia in cells expressing IFT140-GFP in different genetic backgrounds  
1457 and conditions corresponding to the data shown in panel G. Scale bar: 1  $\mu m$  x 1 s.  
1458

1459 **Figure 4. Isolation of intragenic and extragenic suppressors of GFP-LF4A**  
1460 **overexpression. (A-C)** The pipeline used for identification of intragenic and  
1461 extragenic suppressors of overexpression of GFP-LF4A. (A) The structure of the  
1462 transgene that was placed in the micronucleus. The transgene uses MTT1 promoter  
1463 to express GFP-LF4A. A *neo5* cassette is closely linked. The transgene replaces the  
1464 endogenous *LF4A*. (B) An outline of the procedure for generating suppressors. A  
1465 heterokaryon with the ovGFP-lf4a transgene in the micronucleus (solid black) was  
1466 subjected to mutagenesis and a self-fertilizing cross. The homozygous progeny was  
1467 selected based on paromomycin resistance conferred by *neo5* and some progeny  
1468 clones may carry a suppressor mutation (red stripes). The progeny cells were treated  
1469 with Cd<sup>2+</sup> in tubes kept in vertical position. The progeny clones that lack a  
1470 suppressor mutation shorten cilia and sink to the tube bottom. The suppressors (F0)  
1471 remain motile and accumulate near the top of the tube due to negative gravitaxis.  
1472 (C) The principle of testing whether the suppression is intra- or extragenic (for  
1473 details see S3 Fig). The F1 clones were subjected to a self-cross and the pm-r F2  
1474 progeny clones were isolated. An intragenic suppressor gives pm-r F2 progeny clones  
1475 that are 100% motile (suppressed), as the suppression is linked to the transgene. An  
1476 extragenic suppressor generates F2 pm-r clones that are either suppressed (motile)  
1477 or not (paralyzed). (D-F) Cells that were exposed for 6 hours to Cd<sup>2+</sup> to induce GFP-  
1478 LF4A, subjected to immunofluorescence to reveal GFP (green) and polyG tubulin  
1479 (red). Insets show the GFP-LF4A signal alone in examples of cilia at a higher  
1480 magnification. (D) A non-mutagenized non-suppressed cell; GFP-LF4A is enriched at  
1481 the bases of cilia. (E) An intragenic suppressor cell (SUP5); GFP-LF4A is enriched at  
1482 the tips of both oral and locomotory cilia. (F) An extragenic suppressor cell (SUP1);  
1483 GFP-LF4A is prominent at the bases, at the distal ends and along the ciliary shafts in  
1484 short (presumably assembling) cilia. (G) The locomotory cilia length of F2 clones of  
1485 four genotypes without and with 6 hours Cd<sup>2+</sup> treatment. Sample sizes (number of

1486 cilia measured) are indicated, asterisks indicate a statistically significant difference  
1487 (one way Anova  $p < 0.01$ ), error bars indicate SDs. (H) A 3D predicted structure of  
1488 the kinase domain of LF4A based on homology-directed modeling using CDK of  
1489 *Cryptosporidium* (Chain A of PDB 3NIZ) as template. (I) A zoomed-in view of a  
1490 region of the structure showing three locations of substitutions (shown as sticks)  
1491 found in the intragenic suppressors sup3 (E132K), sup4 (G13S) and sup5 (E160K).

1492

1493 **Figure 5. The extragenic suppressor clone SUP1 has a mutation in CDKR1.**

1494 (A-B) Immunofluorescence images of (unsuppressed and suppressed) pools of F2  
1495 progeny derived from a single sup1/SUP1<sup>+</sup> (after an overnight exposure to Cd<sup>2+</sup>) that  
1496 were subsequently subjected to whole genome sequencing. Note the patterns of  
1497 GFP-LF4A inside cilia: the base accumulation in the non-suppressed pool and the  
1498 ciliary shaft and tip signals in the suppressed pool (see insets for higher  
1499 magnifications). (C) The results of variant subtraction and filtering based on the  
1500 alignment of sequencing reads to the macronuclear reference genome. Among the  
1501 278 variants consistent with nitrosoguanidine (MNNG) mutagenesis, three candidate  
1502 variants affect a gene product and have a high fraction of reads supporting the  
1503 alternative base in the mutant pool (see S1 Table). (D) An IGV browser view of the  
1504 macronuclear genome sequence of *THERM\_01080590* (*CDKR1*) that contains the  
1505 variant scf\_8254401:105680 T to C. This point mutation, supported by 100% of the  
1506 sequencing reads from the mutant pool, changes the stop codon and adds a short  
1507 peptide to the C-terminus of the predicted product. (E) An allelic composition  
1508 contrast analysis of the variant co-segregation across all micronuclear chromosomes.  
1509 The normalized linkage scores show the difference in the allelic composition between  
1510 the mutant and the wild-type pool at each variant site. This reveals a cluster of  
1511 variant co-segregation at 9-10 Mb on the micronuclear chromosome 3.

1512

1513 **Figure 6. A loss of CDKR1 lengthens both the locomotory and oral cilia.** (A-  
1514 D') Wildtype (A and A'), LF4A-KO (B and B'), CDKR1-KO (C and C') and double  
1515 knockout LF4A-KO\_CDKR1-KO (D and D') cells that are either in interphase (top  
1516 panels) or dividing (bottom panels). The cells were stained with the anti-polyG  
1517 (green) and anti-centrin antibodies (red). (E) The locomotory cilia lengths in different  
1518 backgrounds. The cilia length in LF4A-KO, CDKR1-KO and the double knockout strain  
1519 are similar ( $p > 0.01$ ) and all are significantly longer than the wild-type cilia (one  
1520 way Anova,  $p < 0.01$ ). Sample sizes are indicated, error bars indicate SDs.

1521

1522 **Figure 7. A complete loss of CDKR1 rescues the cilia shortening induced by**  
1523 **GFP-LF4A overexpression and reduces the LF4A kinase activity.** GFP-  
1524 overproducing cells that have either wild-type CDKR1 (A, C, E) or are CDKR1-KO (B,  
1525 D, F), imaged before (A and B) or after a 6 hours exposure to  $Cd^{2+}$  (C, D, E and F).  
1526 In A-D, the cells were stained with the anti-polyG antibodies (green) and anti-centrin  
1527 antibodies (red). In (E) and (F), the cells show a GFP-LF4A signal (green) and were  
1528 stained with anti-polyG antibodies (red) antibodies. In cells lacking CDKR1,  
1529 overproduced GFP-LF4A accumulated at the distal ends of cilia (F), indicating a  
1530 reduced LF4A kinase activity. (G) The growth rates of multiple strains that  
1531 overproduce GFP-LF4A and are either wild-type or CDKR1-KO. The cells were  
1532 inoculated in SPPA media without  $Cd^{2+}$  (each data point averages 6 cultures), and an  
1533 overexpression of GFP-LF4A was induced at 12 hours (each data point averages 3  
1534 cultures hereafter). (H) An *in vitro* kinase activity of overproduced GFP-LF4A isolated  
1535 from two cells that are either otherwise (CDKR1<sup>+</sup>) and CDKR1-KO. The  
1536 phosphorylated products were detected on a western blot probed with the anti-



1537 thiophosphorylation antibody 51-8 (the upper and middle panels show areas of the  
1538 same blot containing the autophosphorylated GFP-LF4A and MBP, respectively). The  
1539 same amounts of IP inputs were analyzed on a western blot probed the anti-GFP  
1540 antibodies shown in the bottom panel (WB: GFP) the multiple bands likely are likely  
1541 proteolytic degradation products of GFP-LF4A. (I) Top: a graphical summary of the  
1542 phenotypes and genotypes. Bottom: a scheme of the likely pathway involving  
1543 CDKR1, LF4A and another kinase, likely an RCK that acts downstream of CDKR1 in  
1544 oral cilia.

1545

1546

## 1547 **Supporting information**

1548

### 1549 **S1 Figure. L4B is associated with the cell-cell junction during conjugation.**

1550 (A-C) Cells expressing LF4B-GFP (the tag added by engineering the native locus)  
1551 analyzed by immunofluorescence using anti-GFP antibodies (red) 12G10 anti- $\alpha$ -  
1552 tubulin (green only in panel C) and DAPI (Blue). (A) A vegetatively growing cell. Note  
1553 an absence of a GFP signal above the typical background. (B-C) A conjugating pair.  
1554 Note that LF4B-GFP localizes to the junction between the two mating cells. (D)  
1555 Expression profiles of mRNAs for LF4A (TTHERM\_00058800) and LF4B  
1556 (TTHERM\_00822360) obtained from the *Tetrahymena* Functional Genomics database  
1557 ([http://tfgd.ihb.ac.cn/search/detail/gene/TTHERM\\_00822360](http://tfgd.ihb.ac.cn/search/detail/gene/TTHERM_00822360)). The levels of mRNA  
1558 at the following conditions are shown: L-l, L-m and L-h: vegetatively growing cells  
1559 collected at  $\sim 1 \times 10^5$  cells/ml,  $\sim 3.5 \times 10^5$  cells/ml and  $\sim 1 \times 10^6$  cells/ml. S-0, S-3, S-6,  
1560 S-9, S-12, S-15 and S-24: cells starving for 0, 3, 6, 9, 12, 15 and 24 hours. C-0, C-  
1561 2, C-4, C-6, C-8, C-10, C-12, C-14, C-16 and C-18: conjugating cells collected at 0,

1562 2, 4, 6, 8, 10, 12, 14, 16 and 18 hours after initiation of conjugation by mixing  
1563 different mating types.

1564

1565 **S2 Figure. Association of GFP-LF4A with microtubules and its co-transport**  
1566 **with IFT.** (A) TIRF images of live cells overexpressing GFP-LF4A (left), kinase-weak  
1567 GFP-LF4A<sup>F82A</sup> variant (middle), and kinase weak mCherry-LF4A<sup>F82A</sup>. Overexpressed  
1568 GFP-LF4A (right panel) localized to the bases of cilia and along cilia but also near the  
1569 microtubule-rich structures in the cell body including longitudinal microtubules (lm),  
1570 and contractile vacuole pores (cvp). The kinase-weak GFP-LF4A<sup>F82A</sup> is enriched at the  
1571 tips of cilia while mCherry-LF4A<sup>F82A</sup> is distributed uniformly along cilia. (B)  
1572 Kymographs that document co-migration of IFT proteins (GFP-DYF1 or IFT140-GFP,  
1573 top) and either mCherry-LF4A or mCherry-LF4AF82A after induction with Cd<sup>2+</sup> (3  
1574 hours). (C) Signal intensity profiles of single cilia in cells expressing either mCherry-  
1575 LF4 or mCherry-LF4F82A (red) and IFT140-GFP (green). The base is on the left and  
1576 the tip is on the right side of each profile. Note that the active kinase is enriched at  
1577 the base (left profile). The weak kinase is enriched at the base and spread along the  
1578 cilium length when overproduced but does not accumulate at the tip. The pattern  
1579 distribution of IFT140 is similar in all background and conditions, with enrichment at  
1580 the tip.

1581

1582 **S3 Figure. A detailed presentation of the pipeline used for identifying**  
1583 **suppressors of overexpression of GFP-LF4A.** (A) Steps involved in generation  
1584 and isolation of the suppressor F0s. A heterokaryon with the ovGFP-LF4A transgene  
1585 in the micronucleus (solid black) was subjected to mutagenesis with  
1586 nitrosoguanidine. The mutagenized heterokaryon was subjected to a self-cross

1587 (uniparental cytogamy) that involves a mating to a star strain that lacks a functional  
1588 micronucleus. The outcome includes the desired self-cross progeny (uniparental  
1589 cytogamonts, typically a few % of the conjugated pairs), cells that failed to undergo  
1590 conjugation (nonconjugants) and round one genomic exclusion, the most common  
1591 outcome of such a cross (typically >95%). The uniparental cytogamy progeny were  
1592 selected with paromomycin (pm) as they expressed the transgene in the  
1593 macronucleus. The suppressor F0s were then isolated by collecting cells that  
1594 remained mobile after overnight Cd<sup>2+</sup> exposure. (B) Steps used to determine  
1595 whether the suppression is intragenic or extragenic. Each suppressor F0 clone  
1596 underwent sexual maturation and was mated to CU427, a strain with a micronucleus  
1597 carrying a homozygous *chx1-1* allele (resistance to cycloheximide cy) and a wild-  
1598 type macronucleus. The outcross progeny was selected with cy and pm. F1 clones  
1599 underwent phenotypic assortment to pm-s and become sexually mature. The pm-s  
1600 F1 clone was then subjected to self-cross (short-circuit genomic exclusion) and the  
1601 pm-r F2 clones were obtained. A number of F2 clones of each suppressor were tested  
1602 for suppression by Cd<sup>2+</sup> treatment. An intragenic suppressor gives only suppressed  
1603 F2 clones. An extragenic suppressor gives both unsuppressed (paralyzed) and  
1604 suppressed F2 progeny.

1605

1606 **S4 Figure. Phenotypes of intragenic and extragenic suppressors of GFP-**

1607 **LF4A overexpression.** Self-cross progeny at a control background of GFP-LF4A  
1608 overexpression (A), the extragenic suppressor SUP1 (B) and three intragenic  
1609 suppressors SUP3, SUP4 and SUP5 (C-E). All cells were subjected to a 6-hours Cd<sup>2+</sup>  
1610 exposure prior to immunofluorescence assay and showed the GFP signal (green) and  
1611 were stained with anti-polyG antibodies (red).

1612

1613 **S5 Figure. A predicted structure suggests that the C-terminal tail extension**

1614 **in CDKR1<sup>sup1</sup> affects the kinase function.** (A) Predicted structure of CDKR1<sup>sup1</sup>

1615 with a C-terminal tail (with a WIRNLLILNG extension) forming two helical segments

1616 on the top of C-helix. (B) 3D view comparison of the C-helix (and cyclin-CDK

1617 interface) of CDKR1<sup>sup1</sup> and a CDK2. A PSTAIRE sequence in the canonical CDKs lies

1618 at the interface of the cyclin-CDK complex and corresponds to the C-helix in the

1619 CDKs. The equivalent positions in CDKR1 are KQIVERE. (C) A sequence alignment of

1620 fragments of CDK and CDK-related kinases.

1621

1622 **S6 Figure. A loss of CDKR1 does not consistently affects the levels of**

1623 **overproduced GFP-LF4A.** (A) A comparison of the levels of GFP-LF4A in whole cell

1624 lysates of several F2 clones derived from the same F1, with or without a 6-hour Cd<sup>2+</sup>

1625 exposure. An ovGFP-LF4A\_CDKR1<sup>+</sup> control strain and three ovGFP-LF4A\_CDKR1-KO

1626 F2s were analyzed. (B) A comparison of the levels of GFP-LF4A in whole cell lysates

1627 of the F2 progeny clones of the extragenic suppressor SUP1, with or without a 6-

1628 hour Cd<sup>2+</sup> exposure. An unsuppressed (ovGFP-LF4A\_CDKR1<sup>+</sup>) strain and four

1629 suppressed (ovGFP-LF4A\_CDKR1<sup>sup1</sup>) strains were analyzed. Faster-migrating bands

1630 represent degradation products of GFP-LF4A. (C) In vitro kinase assays show that

1631 loss-of-function of CDKR1 result in a reduced kinase activity of overproduced GFP-

1632 LF4A against itself and MBP. The top panel is a western blot that reveals the signal of

1633 thiophosphorylated substrates. The bottom panel is a western blot that documents

1634 the levels of GFP-LF4A in the reactions using anti-GFP antibodies

1635

1636 **S1 Video.** A live cell expressing LF4A-GFP (under the native promoter) recorded by  
1637 TIRFM. The frame rate is 3 times of the real time. Examples of rare cilia with mobile  
1638 LF4A-GFP are marked by red boxes.

1639

1640 **S2 Video.** A TIRFM video of a live wild-type cell expressing GFP-DYF1 reporter  
1641 (treated with Cd<sup>2+</sup> for 3.5 hours). The frame rate is 3 times of the real time.

1642

1643 **S3 Video.** A TIRFM video of a live cell that overexpresses GFP-LF4A (treated with  
1644 Cd<sup>2+</sup> for 3.5 hours) that also expresses GFP-DYF1 reporter. The frame rate is 3  
1645 times of the real time.

1646

1647 **Table S1** The candidate causal variants identified in the SUP1 suppressor genome  
1648 based on bioinformatic subtractions and filtering.

1649

1650

1651

Fig. 1

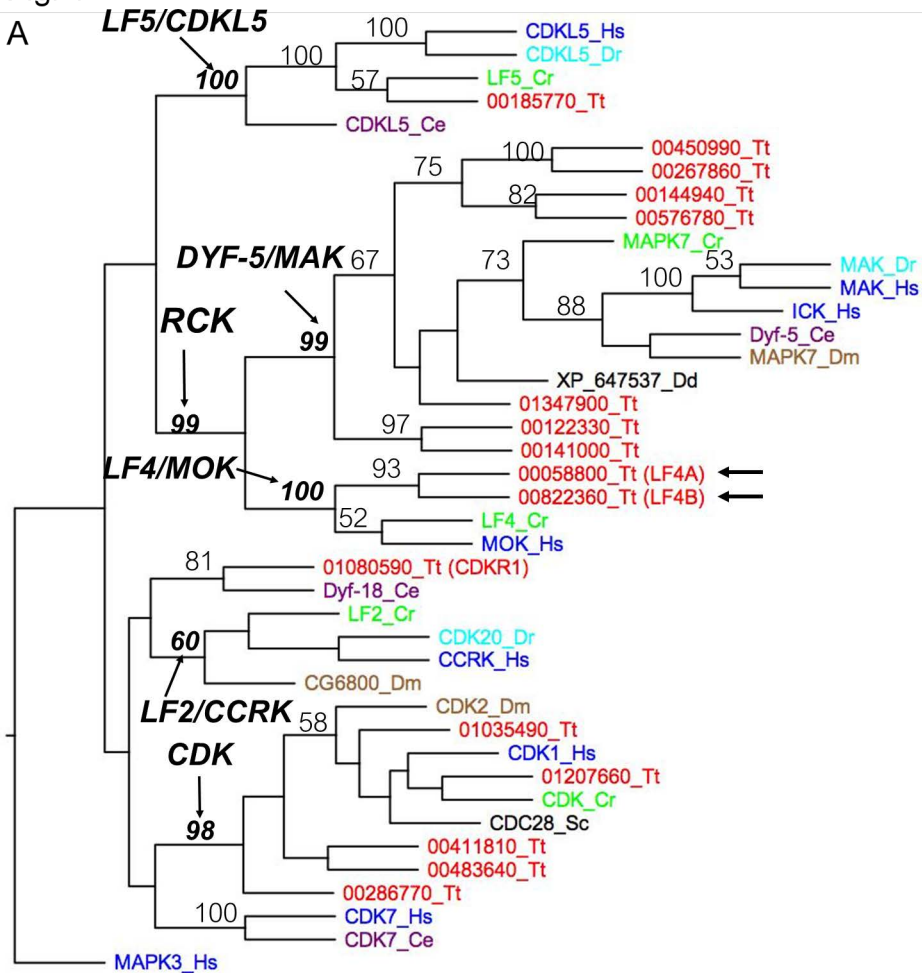

polyG centrin

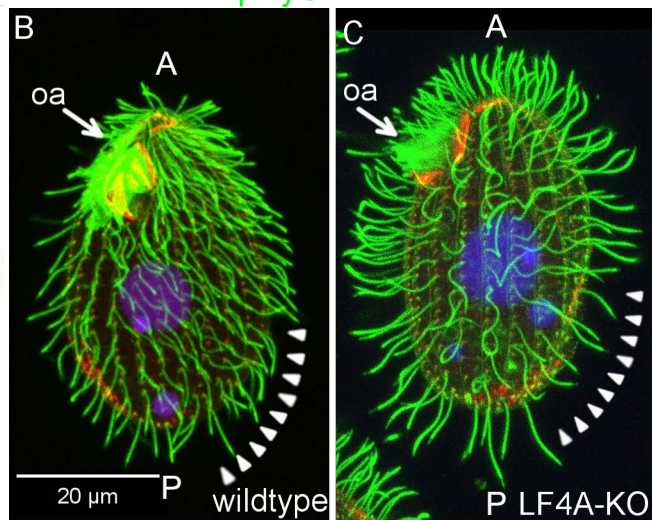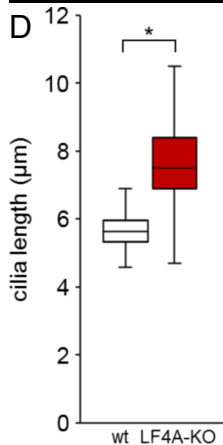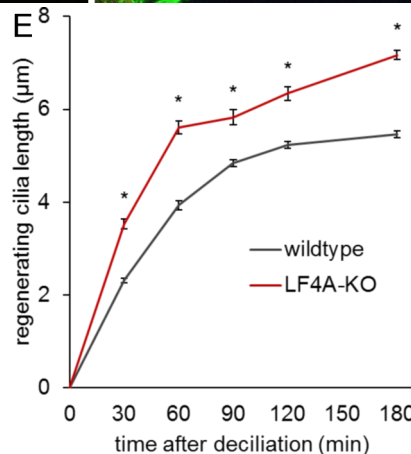

Fig. 2

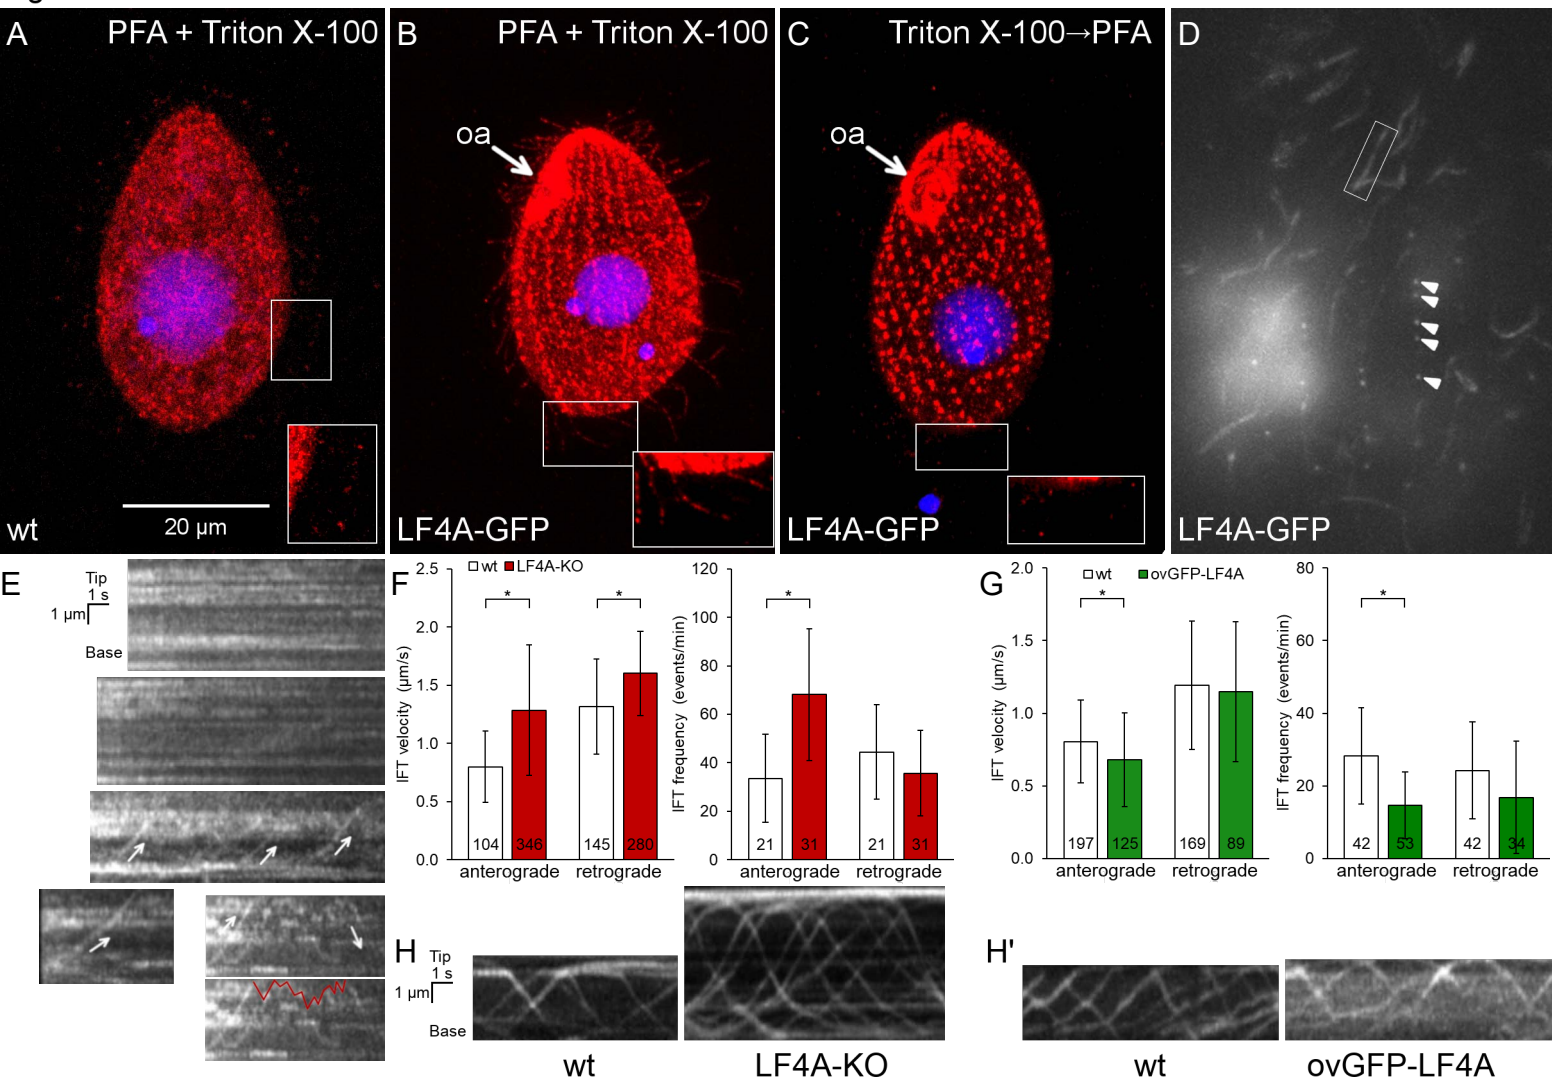

Fig. 3

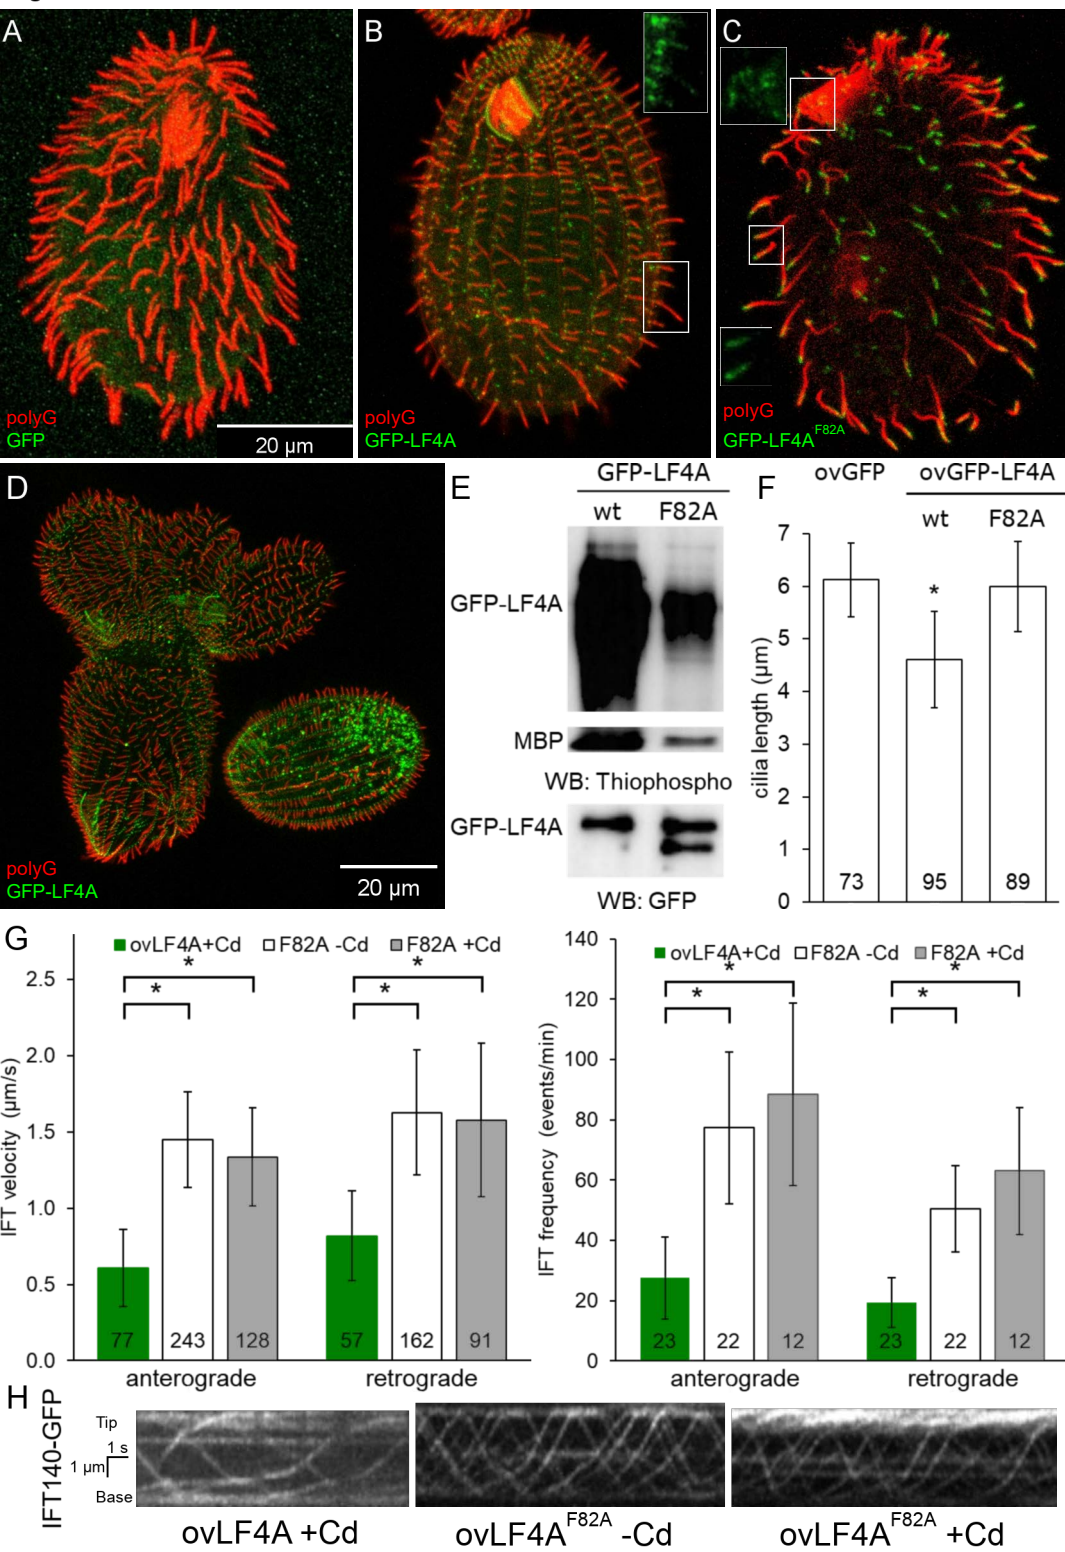



**Fig. 4**

**A**

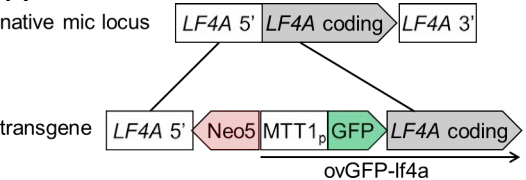

**B**

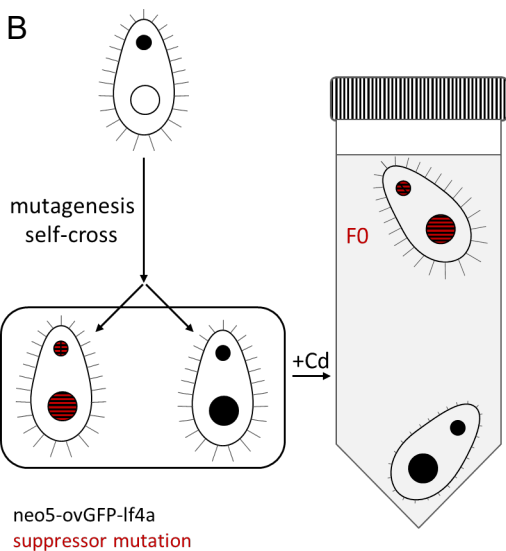

**C**

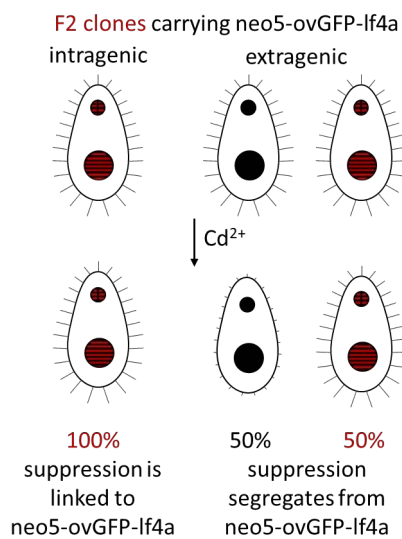

**D**

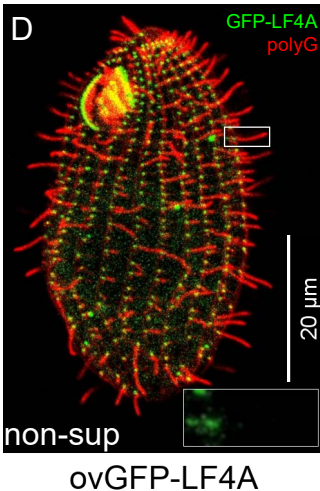

**E**

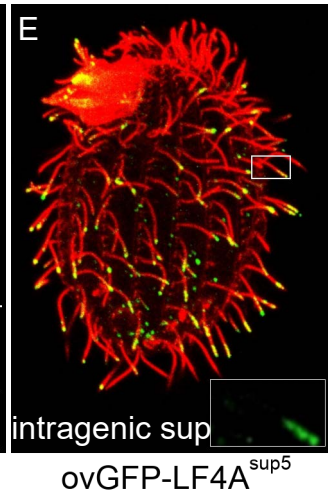

**F**

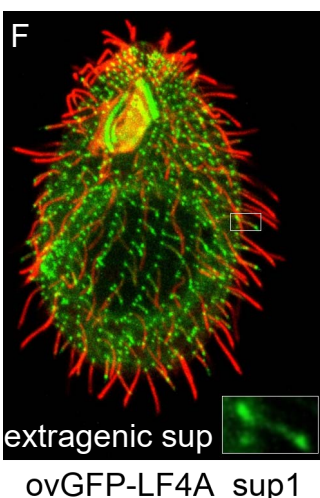

**G**

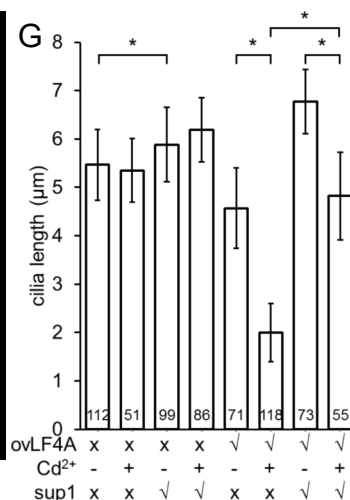

**H**

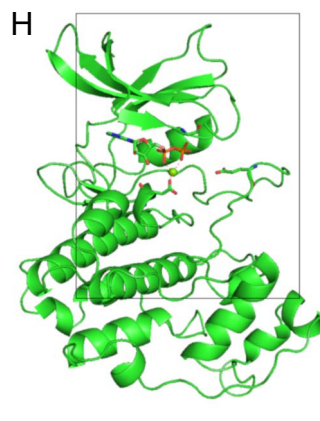

**I**

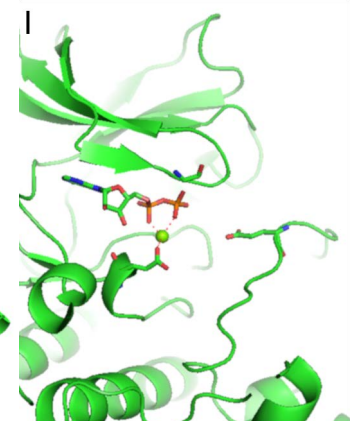

Fig. 5

GFP-LF4A polyG

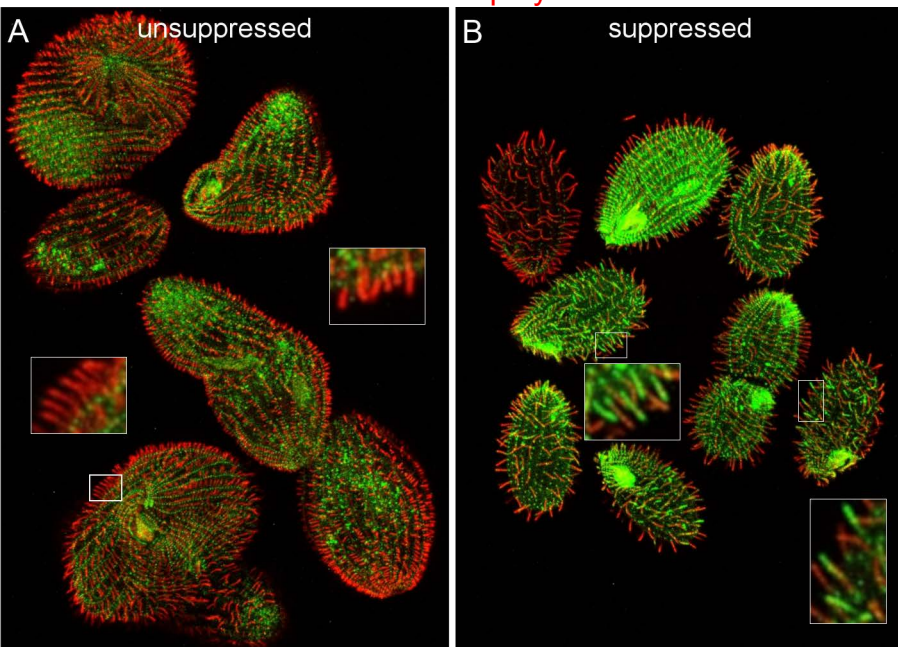

**C**      homogenous variants → suppressed specific → MNNG filtered → Final variants

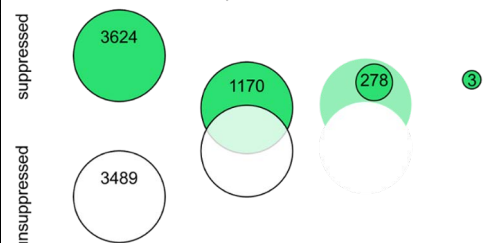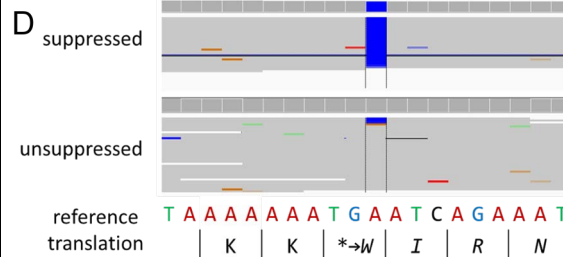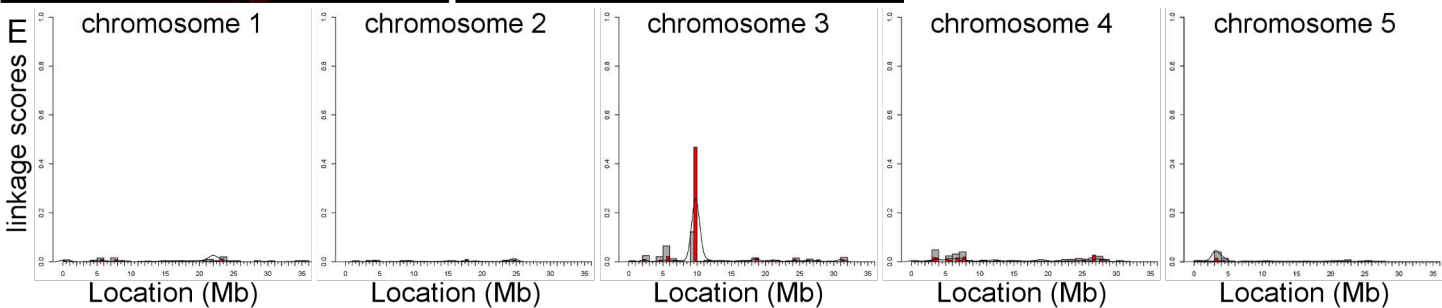

**Fig. 6**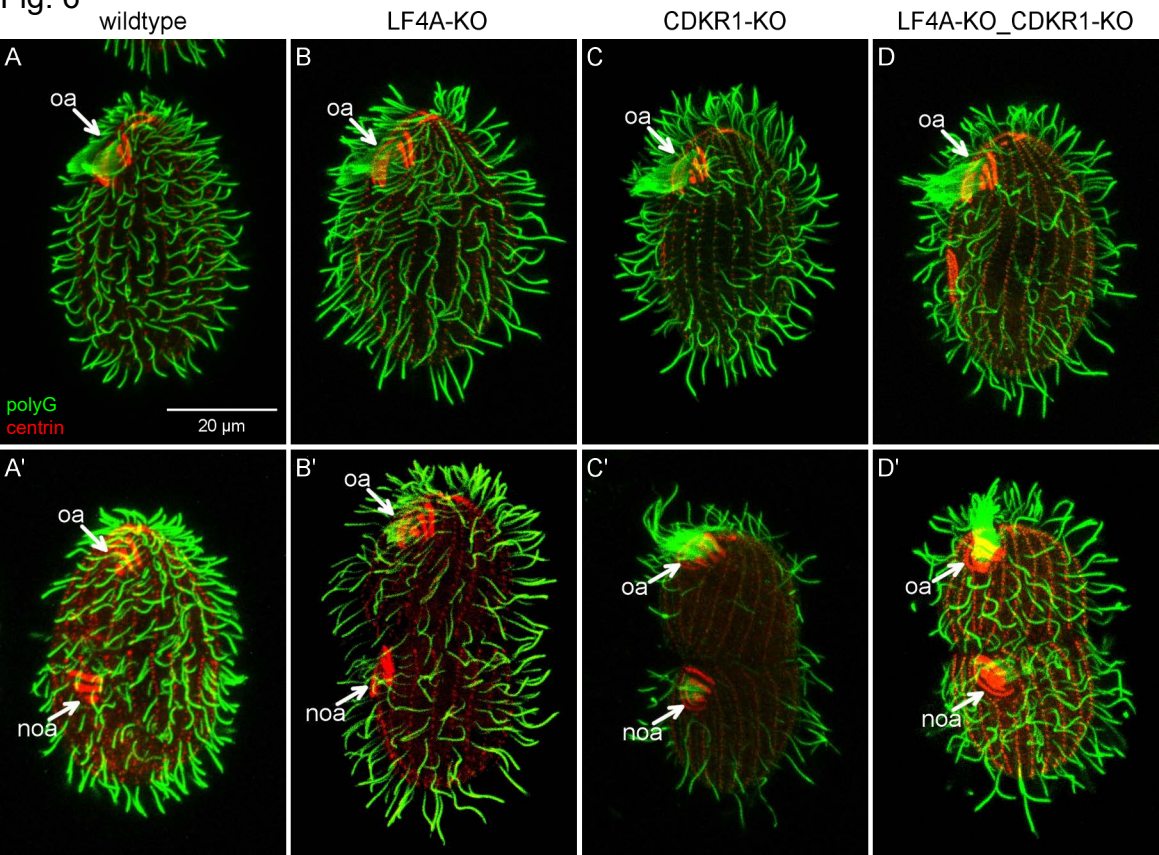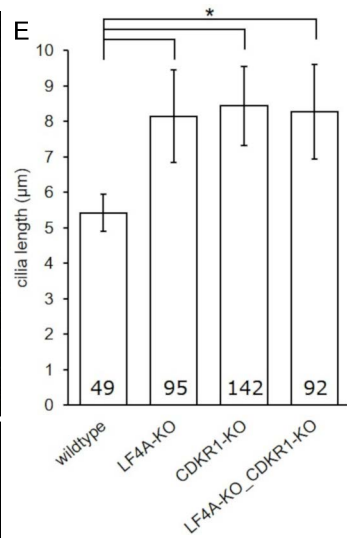

Fig. 7

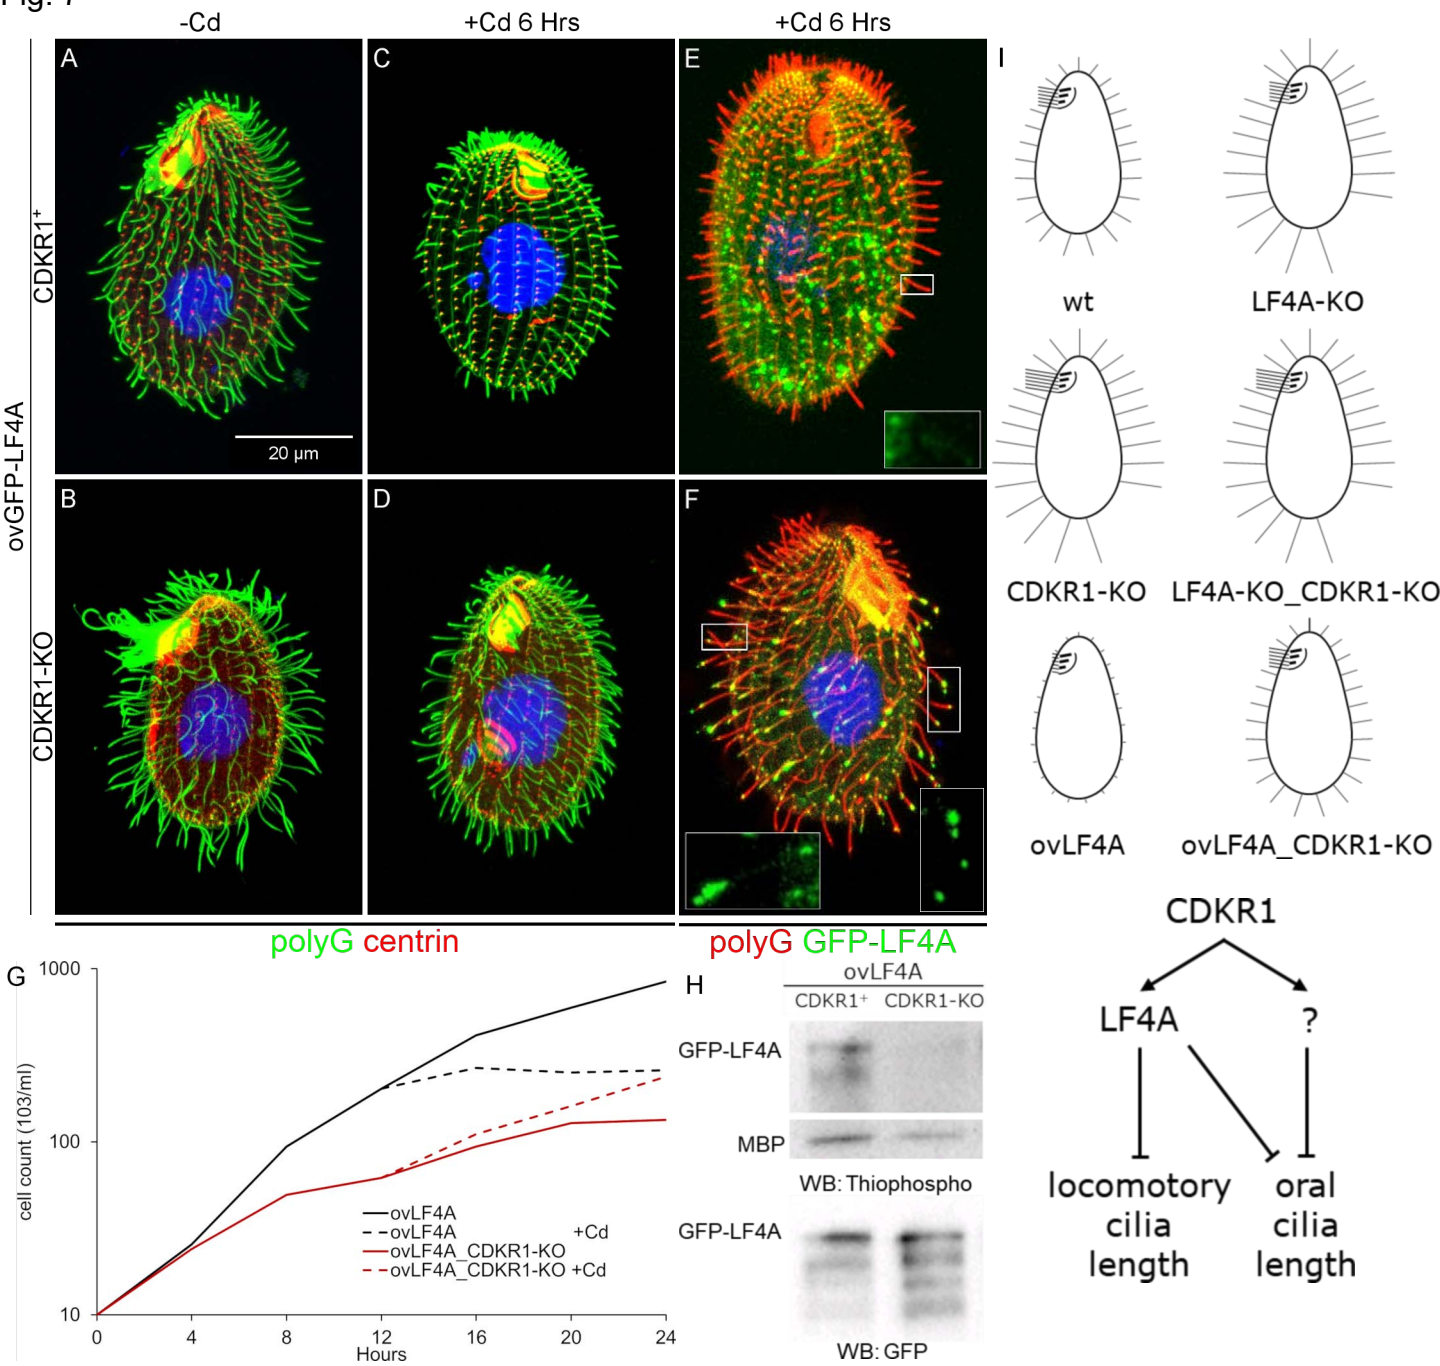

Fig. S1

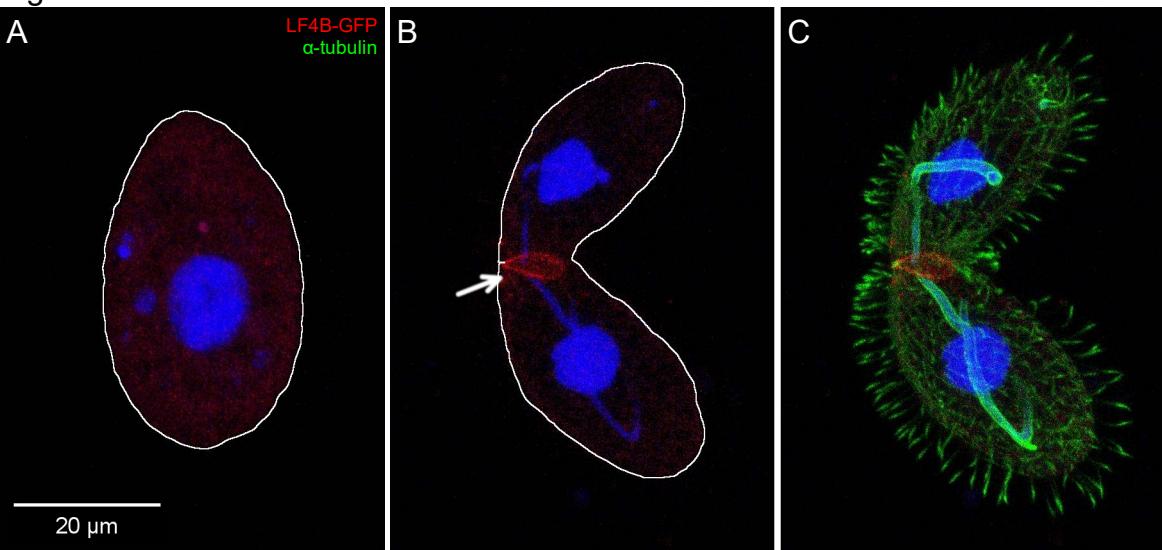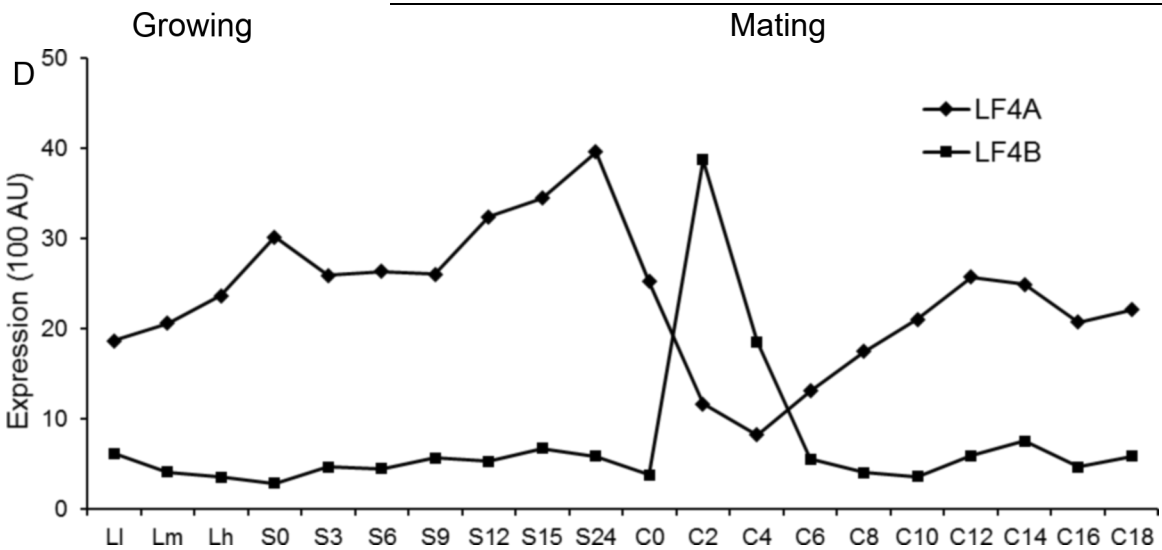

# S2 Figure

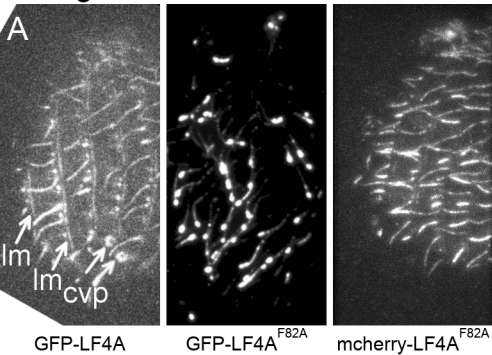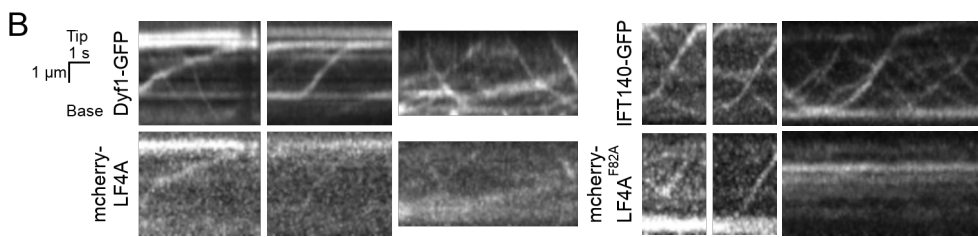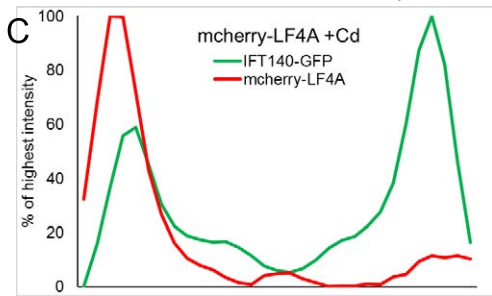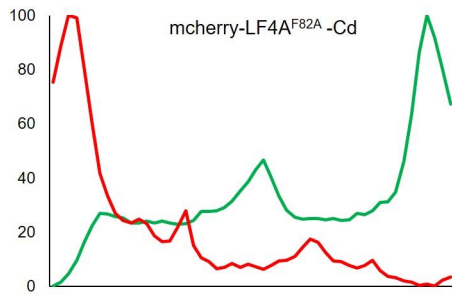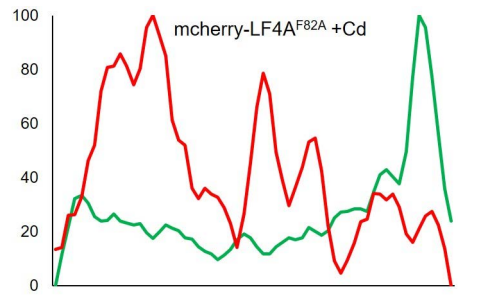

# S3 Figure

## A

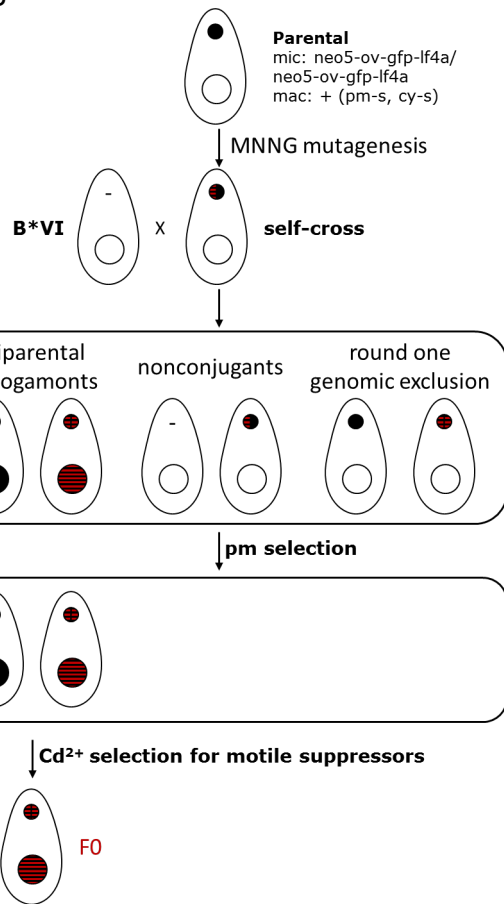

## B

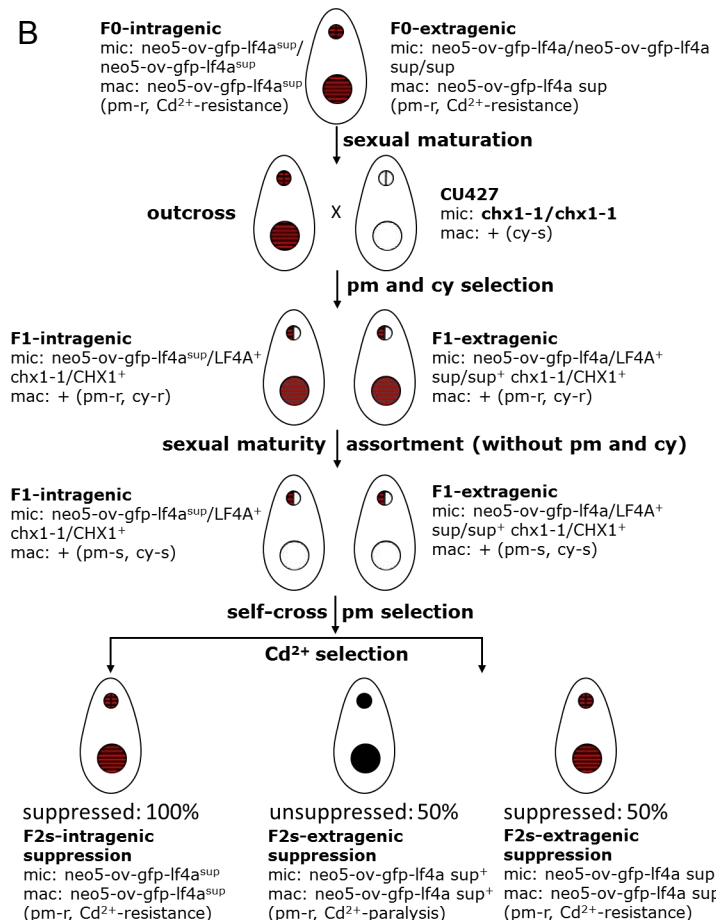

S4 Figure

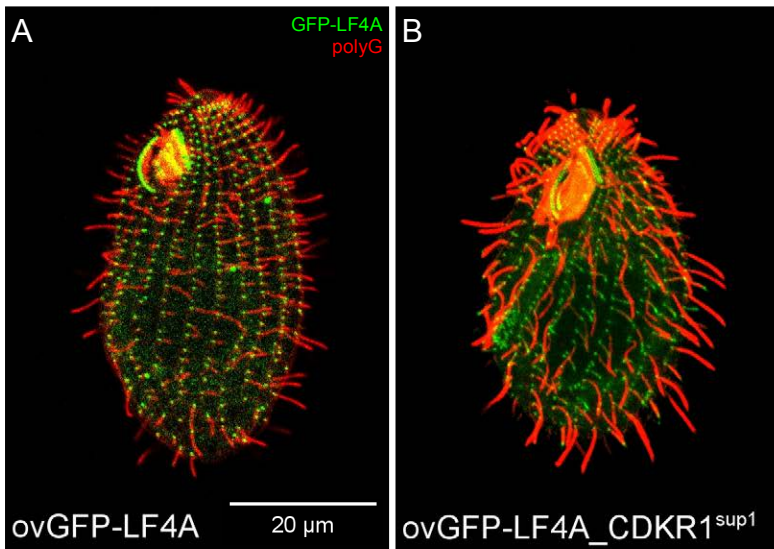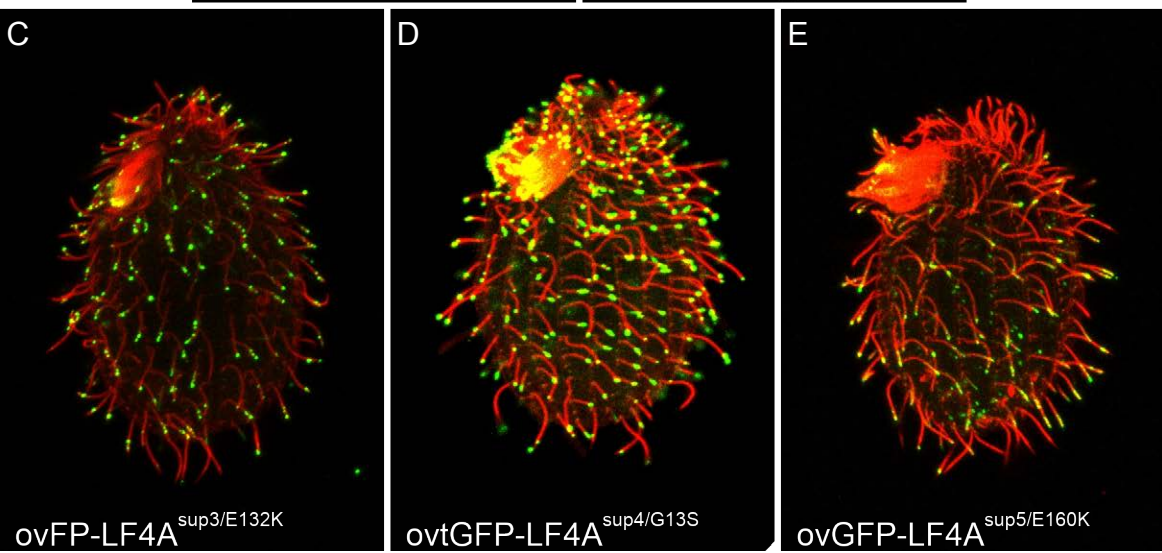



## S5 Figure

A

WIRNLLILNG extension

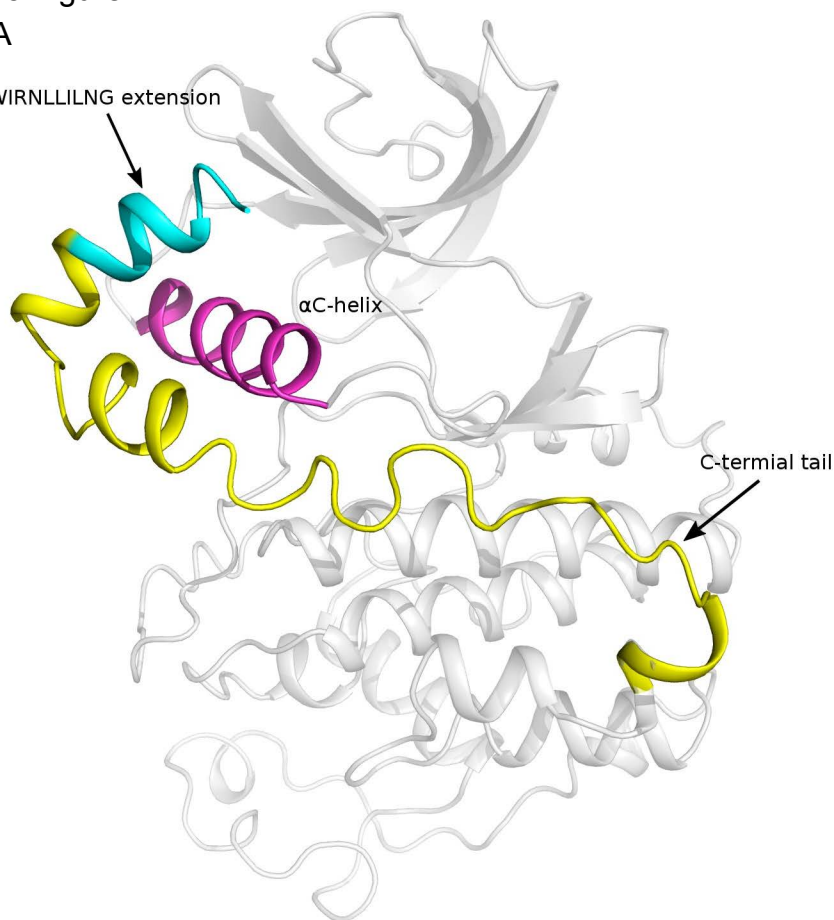

B

CDKR1<sup>sup1</sup>

CDK2-cyclin

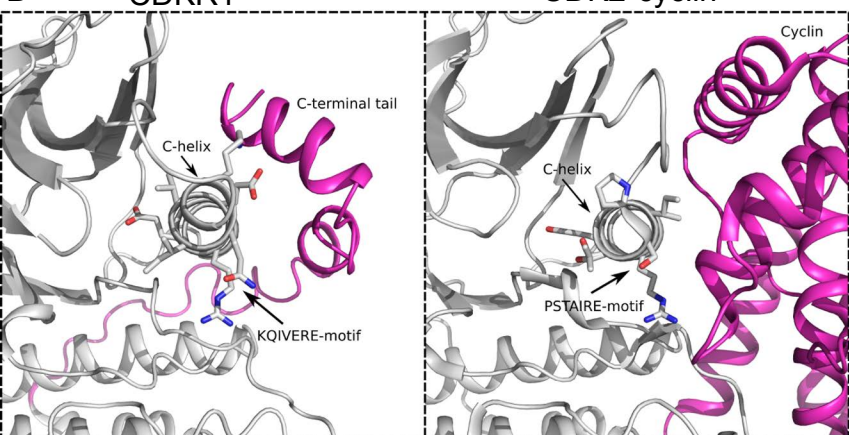

C

|             |                                |                                    |                            |                      |
|-------------|--------------------------------|------------------------------------|----------------------------|----------------------|
| CDKR1_Tt    | NQ----                         | NKRSKQIVEREVSIMQDLNDHPNIVKLI       | DIYQI--                    | SNNKCSLVMEYIDYDLKQFI |
| Dyf18_Ce    | PNV-----                       | SKVSLAREISCLRNLH-HRNILKLLDCFP--    | SADLMSIVTTEVPYTLGDII       |                      |
| LF2_Cr      | RN----                         | TGGIPDVVVREIKALQSVS-HPNVVALLDVFP-- | KGQAIYLVQEQYCTTDLAALL      |                      |
| CCRK_Hs     | RRL----                        | EDGFNPQALREIKALQEMEDNQYVVQLKAVFP-- | HGGGFVLAPEFMLSDLAEVV       |                      |
| CDK7_Hs     | GHRSEAKDGINRTALREIKLLQELS-HPNI | IGLLDAFG--                         | HKSNISLVPDFMETDLEVII       |                      |
| 00286770_Tt | DPNE--                         | DEGVPSTTLREISILKLLK-HKNIVKLLD      | VVYFPEAQVSLVFEYYPQDLRGYL   |                      |
| 00483640_Tt | DYEEIGDEGIPSTALREISCLKALD-HPNV | VKLVVVYIMKKNKLYLVFEYIDYDLKAYQ      |                            |                      |
| 00411810_Tt | ENE----                        | DEGVPSTALREISILKELQPHPNIVCMHEVI    | YQPQEKKLYLVFEFVDQDLKKFL    |                      |
| 01207660_Tt | ESE----                        | DEGIPSTAIAREISLLKELQ-HPNVVRLHD     | VIH--SNKKLVLVFEFVDQDLKKFM  |                      |
| 01035490_Tt | EHE----                        | DEGVPSTAIAREISLLKEID-HPNVIKLRD     | LVY--GENKLYLIFDYLDHDLKKYL  |                      |
| CDK1_Hs     | ESE----                        | EEGVPSTAIAREISLLKELR-HPNIVSLQD     | VLM--QDSRLYLIFEFLSMDLKKYL  |                      |
| CDC28_Sc    | ESE----                        | DEGVPSTAIAREISLLKELK-DDNIVRLYD     | IVH--SDAHKLYLVFEFLDLDLKRKM |                      |
| CDK_Cr      | EQE----                        | DEGVPSTAIAREISFLKELR-HDNVVRLYD     | VLY--SDRRLYLVFEFLDLDLKKQM  |                      |

\*\* : . . . : : :

: : \*

# S6 Figure

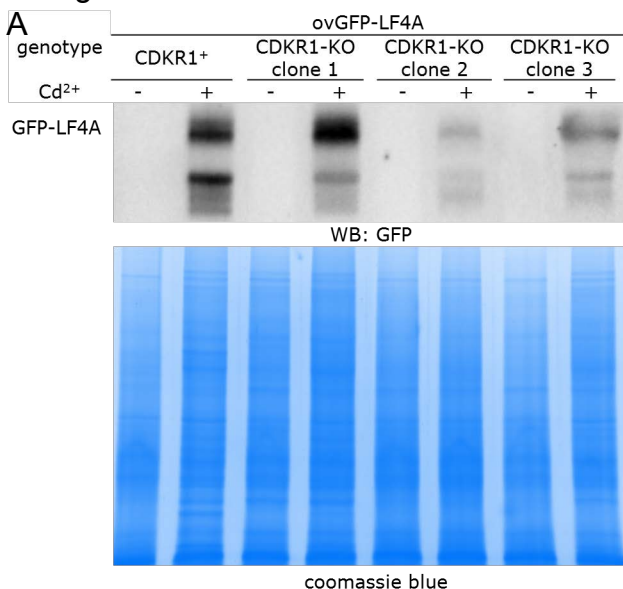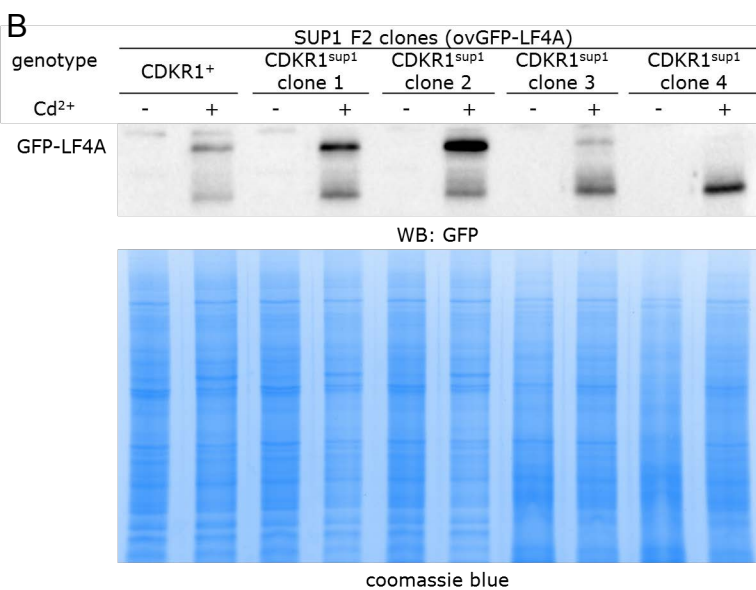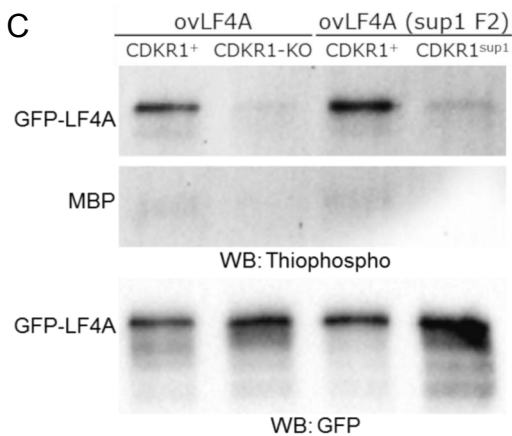

Source: http://biorxiv.org/content/10.1101/582833v1.full.pdf
